# Supplementary material for: Evidence-based expert consensus on the management of primary central nervous system lymphoma in China
Source: PubMed Central journal article supplement (PMC9524012; doi:10.1186/s13045-022-01356-7), 2022-09-29
Supplement: 13045_2022_1356_MOESM2_ESM.pdf [file 13045_2022_1356_MOESM2_ESM.pdf]

## Additional file 2. Search strategies in each database

### Databases searched:

- Databases in English: PubMed, EMBASE, Cochrane Library, WOS, Epistemonikos
- Databases in Chinese: CNKI, Wanfang, CBM

### Time of researching:

from inception of the database through April 23, 2021

### Detailed Search strategy in each database:

#### ● PubMed

- #1 "primary central nervous system lymphoma"[Title/Abstract]
- #2 "PCNSL"[Title/Abstract]
- #3 "primary CNS lymphoma"[Title/Abstract]
- #4 "diffuse large b cell lymphoma"[Title/Abstract]
- #5 "Lymphoma, Large B-Cell, Diffuse"[Mesh]
- #6 "DLBCL"[Title/Abstract]
- #7 "central nervous system"[Title/Abstract]
- #8 "CNS"[Title/Abstract]
- #9 #4 OR #5 OR #6
- #10#7 OR #8
- #11#9 AND #10
- #12OR/#1-#3
- #13#11 OR #12

#### ● EMBASE

- #1 'primary central nervous system lymphoma'/exp
- #2 'diffuse large b cell lymphoma'/exp
- #3 'central nervous system'/exp
- #4 'primary central nervous system lymphoma':ab,kw,ti
- #5 'pcnsl':ab,kw,ti
- #6 'primary CNS lymphoma':ab,kw,ti
- #7 'diffuse large b cell lymphoma':ab,kw,ti
- #8 'dlbcl':ab,kw,ti
- #9 'central nervous system':ab,kw,ti
- #10'cns':ab,kw,ti
- #11#2 OR #7 OR #8
- #12#3 OR #9 OR #10
- #13#11 AND #12
- #14#1 OR #4 OR #5 OR#6 OR #13
- #15#14 AND [medline]/lim
- #16#14 NOT #15

- **Cochrane Library**

- #1 MeSH descriptor: [Lymphoma, Large B-Cell, Diffuse] explode all trees
- #2 MeSH descriptor: [Central Nervous System] explode all trees
- #3 'diffuse large b cell lymphoma':ti,ab,kw
- #4 'dlbcl':ti,ab,kw
- #5 'central nervous system':ti,ab,kw
- #6 'cns':ti,ab,kw
- #7 #1 OR #3 OR #4
- #8 #2 OR #5 OR #6
- #9 #7 AND #8
- #10'primary central nervous system lymphoma':ti,ab,kw
- #11'pcnsl':ti,ab,kw
- #12'primary CNS lymphoma':ti,ab,kw
- #13#10 OR #11 OR #12
- #14#9 OR #13

- **Web of Science**

- #1 Topic: ("CNS")
- #2 Topic: ("central nervous system")
- #3 Topic: ("DLBCL")
- #4 Topic: TS=("diffuse large b cell lymphoma")
- #5 Topic: ("primary central nervous system lymphoma")
- #6 Topic: ("PCNSL")
- #7 Topic: ("primary CNS lymphoma")
- #8 #1 OR #2
- #9 #3 OR #4
- #10#8 AND #9
- #11#5 OR #6 OR #7
- #12#10 OR #11

- **Epistemonikos**

- #1 title/abstract:("DLBCL")
- #2 title/abstract:("diffuse large b cell lymphoma")
- #3 title/abstract:("CNS")
- #4 title/abstract:("central nervous system")
- #5 #1 OR #2
- #6 #3 OR #4
- #7 #5 AND #6
- #8 title/abstract:("primary central nervous system lymphoma")
- #9 title/abstract:("PCNSL")
- #10title/abstract:("primary CNS lymphoma")

#11 OR/#8-#10

#12#7 OR #11

● **CNKI (database in Chinese)**

#1 “原发性中枢神经系统淋巴瘤”[主题] (Chinese characters means: primary central nervous system lymphoma)

#2 “原发中枢神经系统淋巴瘤”[主题] (Chinese characters means: primary central nervous system lymphoma)

#3 “PCNSL”[主题]

#4 “中枢神经系统弥漫大 B 细胞淋巴瘤”[主题] (Chinese characters means: central nervous system diffuse large B cell lymphoma)

#5 OR/#1-#4

● **Wanfang (database in Chinese)**

#1 “原发性中枢神经系统淋巴瘤”[主题] (Chinese characters means: primary central nervous system lymphoma)

#2 “原发中枢神经系统淋巴瘤”[主题] (Chinese characters means: primary central nervous system lymphoma)

#3 “PCNSL”[主题]

#4 “中枢神经系统弥漫大 B 细胞淋巴瘤”[主题] (Chinese characters means: central nervous system diffuse large B cell lymphoma)

#5 OR/#1-#4

● **CBM (database in Chinese)**

#1 "原发性中枢神经系统淋巴瘤"[常用字段:智能] (Chinese characters means: primary central nervous system lymphoma)

#2 "原发中枢神经系统淋巴瘤"[常用字段:智能] (Chinese characters means: primary central nervous system lymphoma)

#3 "PCNSL"[常用字段:智能]

#4 "中枢神经系统弥漫大 B 细胞淋巴瘤"[常用字段:智能] (Chinese characters means: central nervous system diffuse large B cell lymphoma)

#5 OR/#1-#4
