# Supplementary material for: Evidence-based expert consensus on the management of primary central nervous system lymphoma in China
Source: PubMed Central journal article supplement (PMC9524012; doi:10.1186/s13045-022-01356-7), 2022-09-29
Supplement: 13045_2022_1356_MOESM3_ESM.pdf [file 13045_2022_1356_MOESM3_ESM.pdf]

### **Additional file 3. Supplementary data for focused Clinical Questions**

#### **CQ 1. Which is the preferred approach to obtain the pathology specimen in patients with PCNSL, stereotactic brain biopsy or resection?**

- ⑩ Population: Patients with PCNSL who need to obtain the pathology specimen
- ⑩ Intervention: Stereotactic brain biopsy
- ⑩ Comparison: Resection

##### **1.1. Inclusion and exclusion criteria**

- ⑩ inclusion criteria: we included published RCT, cohort studies and case control studies, which compared stereotactic brain biopsy with resection in patients with PCNSL who need to obtain the pathology specimen. Studies published in English and Chinese are included.
- ⑩ exclusion criteria: we excluded studies where we failed to access full text, or studies without sufficient data.

## 1.2. Characteristic information of included studies

Supplementary Table S2.1.1. characteristic information of included studies (recent five years)

| Year    | Country                 | Journal                    | Study type          | Age                 | Sample size   | Group 1                | Group 2              | Outcomes                                                                                                                             | Conclusion                                                                                                                                                                                              |
|---------|-------------------------|----------------------------|---------------------|---------------------|---------------|------------------------|----------------------|--------------------------------------------------------------------------------------------------------------------------------------|---------------------------------------------------------------------------------------------------------------------------------------------------------------------------------------------------------|
| 2021[1] | Tongji Hospital, China  | BMC Neurology              | retrospective study | Median 53.3 ± 14.3y | 70 patients   | Resection 28 patients  | Biopsy 42 patients   | Complication : Resection 10.7% vs biopsy 7.1% ; OS : Resection mean 23.4m vs biopsy 11.2m ; PFS : Resection mean 8.6m vs biopsy 4.6m | Compared to stereotactic biopsy, surgical resection may play a role in significantly improving OS and PFS in a subset of patients. Type of surgery and tumor location are prognostic factors for PCNSL. |
| 2021[2] | Tiantan Hospital, China | Chinese Journal of Surgery | retrospective study | <60y count 50%      | 2125 patients | Resection 115 patients | Biopsy 2010 patients | Median Survival Time : Biopsy : 2m (95%CI 1.76-2.24) ; STR : 2m (95%CI 1.4-2.6) ;                                                    | Surgical resection may improve the prognosis of some patients with PCNSL. Chemothera                                                                                                                    |

|         |        |             |                              |       |              |                       |                    |                      |                                                                                                                                                                                                                                                     |
|---------|--------|-------------|------------------------------|-------|--------------|-----------------------|--------------------|----------------------|-----------------------------------------------------------------------------------------------------------------------------------------------------------------------------------------------------------------------------------------------------|
| 2021[3] | Israel | J Neurosurg | retrospective database study | ≥ 18y | 113 patients | Resection 36 patients | Biopsy 77 patients | GTR : 19m (95% 0-39) | py May Prolong Tumor-Specific Survival in Patients with Complete or Selected Tumor Resection. Compared to undergoing diagnostic biopsy only, a specific subgroup of patients with a single PCNSL lesion may have a survival benefit from resection. |
|---------|--------|-------------|------------------------------|-------|--------------|-----------------------|--------------------|----------------------|-----------------------------------------------------------------------------------------------------------------------------------------------------------------------------------------------------------------------------------------------------|

---

|         |                                   |                       |                              |                  |               |                        |                                    |                                                                                                                                                                                                                                                                                                                                                            |                                                                                                                                                                               |
|---------|-----------------------------------|-----------------------|------------------------------|------------------|---------------|------------------------|------------------------------------|------------------------------------------------------------------------------------------------------------------------------------------------------------------------------------------------------------------------------------------------------------------------------------------------------------------------------------------------------------|-------------------------------------------------------------------------------------------------------------------------------------------------------------------------------|
| 2020[4] | Wenzhou Medical University, China | Frontiers in Oncology | retrospective database study | 60-80y count 50% | 3543 patients | Resection 851 patients | Biopsy or nonsurgery 2692 patients | resection had a significantly longer survival with a median survival of 35.0 months compared to 8.9 months for the same group of patients who underwent needle biopsy (P = 0.007).<br>1 year OS : Resection 59.2% vs Biopsy or nonsurgery 46.8% ;<br>3-year OS : Resection 44.7% vs Biopsy or nonsurgery 32.5%<br>5-year OS : Resection 36.0% vs Biopsy or | Total excision is superior to subtotal excision. Studies support the favorable impact of surgery on the clinical outcomes of patients with PCNSL. Although further randomized |
|---------|-----------------------------------|-----------------------|------------------------------|------------------|---------------|------------------------|------------------------------------|------------------------------------------------------------------------------------------------------------------------------------------------------------------------------------------------------------------------------------------------------------------------------------------------------------------------------------------------------------|-------------------------------------------------------------------------------------------------------------------------------------------------------------------------------|

---

|             |                                                                            |                           |                           |                   |                                   |                                                                                    |                                                                                                 |    |                                                                                                                                                            |                                                                                                                                                                                                                                                                                                                                                                                     |
|-------------|----------------------------------------------------------------------------|---------------------------|---------------------------|-------------------|-----------------------------------|------------------------------------------------------------------------------------|-------------------------------------------------------------------------------------------------|----|------------------------------------------------------------------------------------------------------------------------------------------------------------|-------------------------------------------------------------------------------------------------------------------------------------------------------------------------------------------------------------------------------------------------------------------------------------------------------------------------------------------------------------------------------------|
|             |                                                                            |                           |                           |                   |                                   |                                                                                    |                                                                                                 |    | nonsurgery<br>26.3%<br>Resection vs<br>nonsurgery<br>HR=0.81                                                                                               | controlled<br>trials are<br>needed, the<br>currently<br>available<br>evidence<br>should be<br>considered<br>in the<br>clinical<br>managem<br>ent of this<br>disease.<br>For<br>intracranial<br>PCNSL,<br>surgical<br>resection<br>improves<br>PFS but not<br>OS.<br>invasion of<br>deep<br>structures is<br>the only<br>independent<br>risk factor<br>for<br>intracranial<br>PCNSL. |
| 2020[<br>5] | The First<br>Affiliated<br>Hospital of<br>Nanchang<br>University,<br>China | World<br>Neurosurg<br>ery | retrospecti<br>ve study   | 2-72y             | 89 patients<br>(intracrania<br>l) | Cranioto<br>my 71<br>patients<br>, GTR :<br>57<br>patients<br>STR : 14<br>patients | Biopsy 18<br>patients, multi<br>ple or<br>isolated<br>lesions<br>invading<br>deep<br>structures |    | Midian PFS:<br>Resection<br>22±1.454m<br>vs Biopsy<br>14±2.863m,<br>P<0.05 ;<br>Midian OS :<br>Resection<br>33±2.998m<br>vs Biopsy<br>26±2.308m,<br>P>0.05 | In 3<br>retrospectiv<br>e datasets,<br>craniotomy                                                                                                                                                                                                                                                                                                                                   |
| 2019[<br>6] | US,<br>Northwest<br>ern<br>University,                                     | Neurosurg<br>ery          | Case-<br>control<br>study | IS :67y<br>vs 63y | 132 PCNSL                         | Cranioto<br>my 60<br>patients                                                      | Biopsy<br>patients                                                                              | 72 | Median<br>Survival<br>Time :<br>Craniotomy                                                                                                                 |                                                                                                                                                                                                                                                                                                                                                                                     |

|                          |                            |      |                                                   |                      |                                                                                                                                |                                                                   |
|--------------------------|----------------------------|------|---------------------------------------------------|----------------------|--------------------------------------------------------------------------------------------------------------------------------|-------------------------------------------------------------------|
|                          |                            |      |                                                   |                      | 46.0 m (95% CI [35.7, 133.4]) vs Biopsy 24.7 m(95% CI [13.8, 54.9]) ,HR 0.68;                                                  | was associated with improved survival compared with PCNSL biopsy. |
| NCDB : 65y vs 65y        | 8936 patients NHL CNS      | with | Craniotomy 3423 patients                          | Biopsy 5513 patients | Median Survival Time : Craniotomy 19.5m (95%CI,16.8-22.0) vs Biopsy 11.0m (95%CI,10.1-12.3 ) , HR=0.83 ;                       |                                                                   |
| SEER : 62y vs 63y vs 65y | 4636 patients NHL with CNS |      | Craniotomy STR : 216 patients GTR : 1070 patients | Biopsy 3350 patients | Median Survival Time : Craniotomy 29m for GTR (95% CI [24, 34]), 24m for STR (95% CI [13, 40]) vs Biopsy 10m (95% CI [10, 12]) |                                                                   |

|         |                          |                      |                              |                                 |             |                        |                 |    |                                                                                                                                            |                                                                                                                                                                                                                                                                                                                                                 |
|---------|--------------------------|----------------------|------------------------------|---------------------------------|-------------|------------------------|-----------------|----|--------------------------------------------------------------------------------------------------------------------------------------------|-------------------------------------------------------------------------------------------------------------------------------------------------------------------------------------------------------------------------------------------------------------------------------------------------------------------------------------------------|
| 2018[7] | Oslo University Hospital | Neurosurgical Review | retrospective database study | Median 65.3 y [range 18.9–80.7] | 79 patients | Craniotomy 32 patients | Biopsy patients | 47 | Median OS : Craniotomy 28.6m ( 0.7-157.5 ) vs Biopsy 11.7m (0.2-136.5)<br>Median PFS : Craniotomy 12.6m ( 0-157.7 ) vs Biopsy 7.7m (0-117) | In patients with PCNSL, resective surgery plays no role in significantly improving OS or PFS, so we do not advocate total resection as a treatment. However, cytoreductive surgery may be useful in patients with potential brain herniation. Patients who had their tumors surgically removed had a median survival of 16.5 months longer than |
| 2018[8] | Argentina                | Arq Neuropsiqui atr  | retrospective study          | Median 59 y (range: 25–84 y)    | 47 patients | Resection 18 patients  | Biopsy patients | 29 | Median Survival Time : Resection 31m (4-194) vs Biopsy 14.5 ( 2-218 ) ,P=0.016                                                             |                                                                                                                                                                                                                                                                                                                                                 |

|         |                                           |                           |                     |                         |              |                       |                 |    |                                                                |                                                                                                                                                                                                                                            |
|---------|-------------------------------------------|---------------------------|---------------------|-------------------------|--------------|-----------------------|-----------------|----|----------------------------------------------------------------|--------------------------------------------------------------------------------------------------------------------------------------------------------------------------------------------------------------------------------------------|
| 2017[9] | Columbia University Irving Medical Center | Journal of Neuro-Oncology | retrospective study | Median 65 (range 21–88) | 129 patients | Resection 58 patients | Biopsy patients | 71 | Complication rate : Resection 17.2% vs Biopsy 28.2% ; P>0.05 ; | those who underwent biopsy alone. Surgical resection of PCNSL is safe in selected patients, with complication rates comparable to those of other intracranial tumors. No conclusions can be drawn about the clinical benefit of resection. |
|---------|-------------------------------------------|---------------------------|---------------------|-------------------------|--------------|-----------------------|-----------------|----|----------------------------------------------------------------|--------------------------------------------------------------------------------------------------------------------------------------------------------------------------------------------------------------------------------------------|

NHL: non-Hodgkin's lymphoma; PCNSL: primary central nervous system lymphoma; CNS: central nervous system; OS: overall survival; PFS: progression-free survival; SEER: Surveillance, Epidemiology, and End Results Program; NCDB: National Cancer Database-Participant User File; GTR: gross total resection; STR: subtotal resection.



### 1.3. Risk of bias

Supplementary Table S2.1.2. Risk of bias of included studies using Newcastle-Ottawa Scale

| Study ID                  | Selection of exposure                    |                                     |                                       |                                                                          | Comparability                            |                                          |                       | Outcome                                         |                                  | Total score |
|---------------------------|------------------------------------------|-------------------------------------|---------------------------------------|--------------------------------------------------------------------------|------------------------------------------|------------------------------------------|-----------------------|-------------------------------------------------|----------------------------------|-------------|
|                           | Representativeness of the exposed cohort | Selection of the non-exposed cohort | Ascertainment of exposure to implants | Demonstration that outcome of interest was not present at start of study | Study controls the most important factor | Study controls for any additional factor | Assessment of outcome | Was follow up long enough for outcomes to occur | Adequacy of follow up of cohorts |             |
| Wu et al, 2021 [1]        | Yes                                      | Yes                                 | Yes                                   | No                                                                       | Yes                                      | No                                       | Yes                   | Yes                                             | Yes                              | 7           |
| Yang et al, 2021[2]       | Yes                                      | Yes                                 | Yes                                   | No                                                                       | No                                       | No                                       | No                    | Yes                                             | Yes                              | 5           |
| Schellekes et al, 2021[3] | Yes                                      | Yes                                 | Yes                                   | Yes                                                                      | Yes                                      | Yes                                      | Yes                   | Yes                                             | Yes                              | 9           |
| Deng et al, 2020[4]       | Yes                                      | Yes                                 | No                                    | No                                                                       | No                                       | Yes                                      | No                    | Yes                                             | Yes                              | 5           |
| Ouyang et al, 2020[5]     | Yes                                      | Yes                                 | Yes                                   | No                                                                       | No                                       | No                                       | No                    | Yes                                             | No                               | 4           |
| Rae et al, 2019[6]        | Yes                                      | Yes                                 | Yes                                   | No                                                                       | Yes                                      | No                                       | Yes                   | Yes                                             | Yes                              | 7           |
| Jahr et al, 2018[7]       | Yes                                      | Yes                                 | Yes                                   | Yes                                                                      | Yes                                      | Yes                                      | Yes                   | Yes                                             | Yes                              | 9           |
| Villalonga et al, 2018[8] | Yes                                      | Yes                                 | Yes                                   | No                                                                       | No                                       | No                                       | No                    | Yes                                             | Yes                              | 5           |
| Cloney et al, 2017[9]     | Yes                                      | Yes                                 | Yes                                   | No                                                                       | Yes                                      | No                                       | Yes                   | Yes                                             | Yes                              | 7           |

## 1.4. Meta-analysis results

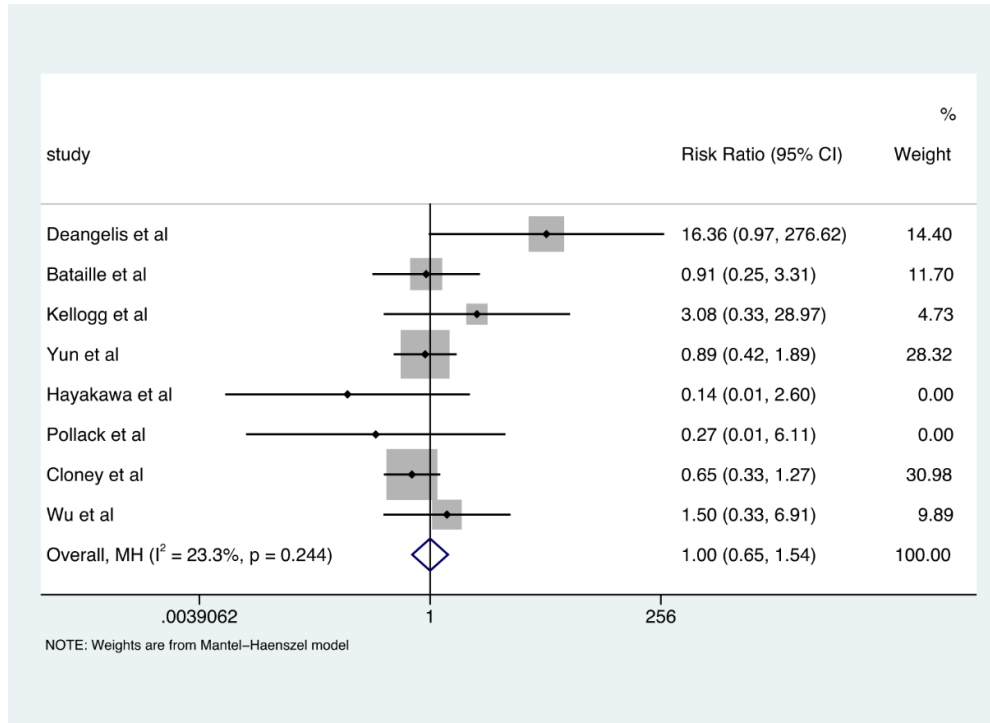

Supplementary Figure S2.1.1. Pooled results of complication incidence in patients with PCNSL who received the stereotactic brain biopsy or resection

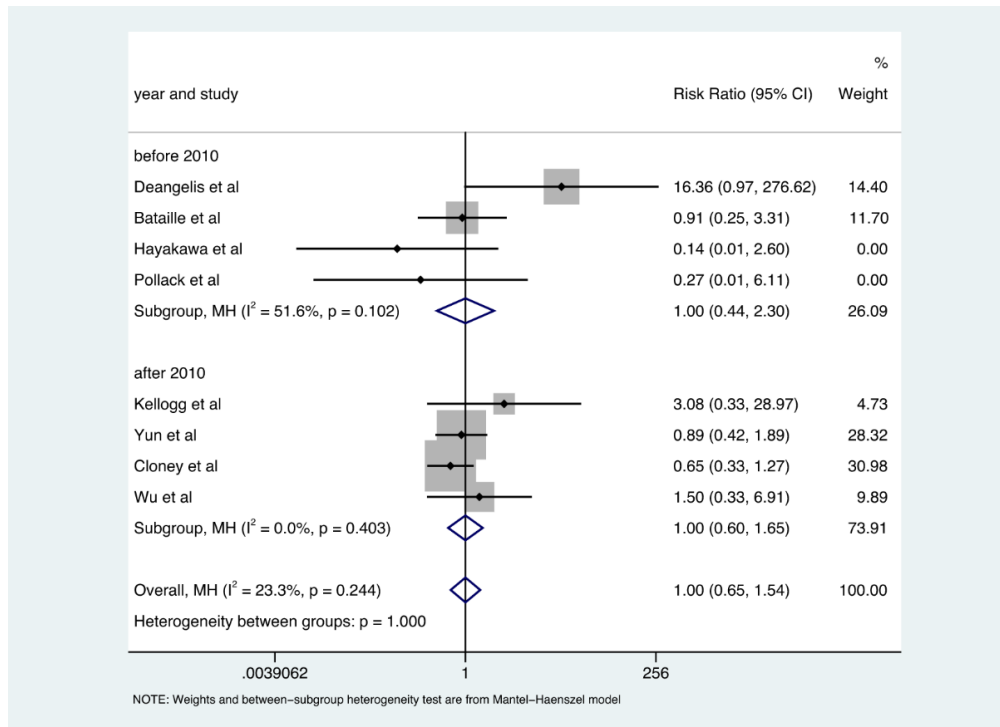

Supplementary Figure S2.1.2. Pooled results of complication incidence in patients with PCNSL who received the stereotactic brain biopsy or resection (studies published before 2010 on top, studies published after 2010 at bottom)

## 1.5. Summary of finding (SoF) table

Patient or population: PCNSL  
 Setting:  
 Intervention: resection  
 Comparison: stereotactic brain biopsy

| Outcomes                           | Anticipated absolute effects* (95% CI) |                            | Relative effect (95% CI) | No of participants (studies)  | Certainty of the evidence (GRADE) | Comments |
|------------------------------------|----------------------------------------|----------------------------|--------------------------|-------------------------------|-----------------------------------|----------|
|                                    | Risk with [comparison]                 | Risk with [intervention]   |                          |                               |                                   |          |
| complication incidence             | 121 per 1,000                          | 121 per 1,000 (79 to 187)  | RR 1.00 (0.65 to 1.54)   | 781 (8 observational studies) | ⊕○○○<br>VERY LOW <sup>a</sup>     |          |
| complication incidence before 2010 | 42 per 1,000                           | 42 per 1,000 (19 to 97)    | RR 1.00 (0.44 to 2.30)   | 406 (4 observational studies) | ⊕○○○<br>VERY LOW <sup>b,c</sup>   |          |
| complication incidence after 2010  | 189 per 1,000                          | 189 per 1,000 (123 to 291) | RR 1.00 (0.65 to 1.54)   | 375 (4 observational studies) | ⊕○○○<br>VERY LOW <sup>b</sup>     |          |

\*The risk in the intervention group (and its 95% confidence interval) is based on the assumed risk in the comparison group and the relative effect of the intervention (and its 95% CI).  
 CI: Confidence interval; RR: Risk ratio

### GRADE Working Group grades of evidence

**High certainty:** We are very confident that the true effect lies close to that of the estimate of the effect

**Moderate certainty:** We are moderately confident in the effect estimate: The true effect is likely to be close to the estimate of the effect, but there is a possibility that it is substantially different

**Low certainty:** Our confidence in the effect estimate is limited: The true effect may be substantially different from the estimate of the effect

**Very low certainty:** We have very little confidence in the effect estimate: The true effect is likely to be substantially different from the estimate of effect

### Explanations

a. The risk of bias was high in eight included studies; b. The risk of bias was high in four included studies; c.  $I^2=51.6\%$

## 1.6. References

- [1] Wu S, Wang J, Liu W, et al. The role of surgical resection in primary central nervous system lymphoma: a single-center retrospective analysis of 70 patients. BMC Neurol. 2021;21(1):190. doi:10.1186/s12883-021-02227-3
- [2] Yang C, Ren X, Jiang H, et al. Different treatment regimens for primary

- central nervous system lymphoma: based on SEER database. *Chin J Surg*, 2021;59(01):52-58.
- [3] Schellekes N, Barbotti A, Abramov Y, et al. Resection of primary central nervous system lymphoma: impact of patient selection on overall survival. *J Neurosurg*. 2021;1-10. doi:10.3171/2020.9.JNS201980
  - [4] Deng X, Xu X, Lin D, et al. Real-World Impact of Surgical Excision on Overall Survival in Primary Central Nervous System Lymphoma. *Front Oncol*. 2020;10:131. Published 2020 Feb 26. doi:10.3389/fonc.2020.00131
  - [5] Ouyang T, Wang L, Zhang N, et al. Clinical Characteristics, Surgical Outcomes, and Prognostic Factors of Intracranial Primary Central Nervous System Lymphoma. *World Neurosurg*. 2020;139:e508-e516. doi:10.1016/j.wneu.2020.04.049
  - [6] Rae AI, Mehta A, Cloney M, et al. Craniotomy and Survival for Primary Central Nervous System Lymphoma. *Neurosurgery*. 2019;84(4):935-944. doi:10.1093/neuros/nyy096
  - [7] Jahr G, Da Broi M, Holte H Jr, Beiske K, Meling TR. The role of surgery in intracranial PCNSL. *Neurosurg Rev*. 2018;41(4):1037-1044. doi:10.1007/s10143-018-0946-0
  - [8] Villalonga JF, Alessandro L, Farez MF, et al. The role of surgery in primary central nervous system lymphomas. *Arq Neuropsiquiatr*. 2018;76(3):139-144. doi:10.1590/0004-282x20180002
  - [9] Cloney MB, Sonabend AM, Yun J, et al. The safety of resection for primary central nervous system lymphoma: a single institution retrospective analysis. *J Neurooncol*. 2017;132(1):189-197. doi:10.1007/s11060-016-2358-8

## **CQ 2. Should corticosteroids be withdrawn from patients with suspected PCNSL/PVRL before biopsy?**

- ⑩ Population: suspected PCNSL/PVRL patients
- ⑩ Intervention: withdrawn corticosteroids
- ⑩ Comparison: not withdrawn corticosteroids

### **2.1. Inclusion and exclusion criteria**

- ⑩ inclusion criteria: we included published studies, which compared the diagnosis true positive rate or false negative rate for suspected PCNSL/PVRL patients between withdrawn corticosteroids and not withdrawn corticosteroids.
- ⑩ exclusion criteria: we excluded studies where we failed to access full text, or studies without sufficient data.

## 2.2. Characteristic information of included studies

Supplementary Table S2.2.1. characteristic information of included studies

| Study ID            | Publication year | Country     | N   | Study type   | corticosteroids dose                      | Duration    | PCNSL/PVRL <sup>1</sup> Case group |               |           | Control groups |               |           |
|---------------------|------------------|-------------|-----|--------------|-------------------------------------------|-------------|------------------------------------|---------------|-----------|----------------|---------------|-----------|
|                     |                  |             |     |              |                                           |             | n                                  | not withdrawn | withdrawn | n              | not withdrawn | withdrawn |
| Bullis CL et al[1]  | 2020             | America     | 54  | Case series  | Cumulative Dexamethasone 4mg-120mg        | 1-27d       | 54                                 | 18            | 36        | -              | -             | -         |
| Binnahil M et al[2] | 2016             | Canada      | 15  | Case         | mean dose of 4 mg every 6 hours           | 2-45d       | 20                                 | 15            | 5         | 135            | 120           | 15        |
| Onder E et al[3]    | 2015             | Turkey      | 25  | Case series  | 4 mg dexamethasone with 6 hours intervals | 2-30d       | 25                                 | 22            | -         | -              | -             | -         |
| Manoj N et al[4]    | 2014             | India       | 76  | Case series  | -                                         | -           | 72                                 | 26            | 46        | -              | -             | -         |
| Zhao H et al[5]     | 2011             | China       | 73  | Case series  | 340mg(10-6000mg)                          | 5.5d(1`60d) | 73                                 | 39            | 34        | -              | -             | -         |
| Porter AB et al[6]  | 2008             | America     | 109 | Case Control | 25mg-6325mg                               | 1-90d       | 13                                 | 8             | 5         | 94             | 60            | 34        |
| Choi YL et al[7]    | 2006             | South Korea | 4   | Case Report  | -                                         | 2~18d       | 4                                  | 4             | 0         | -              | -             | --        |
| Gepfert M et        | 1990             | Germany     | 2   | Case Report  | 8 or 20 mg dexamethasone                  | 2w          | 2                                  | 2             | 0         | -              | -             | --        |

---

al[8]

t

ne  
Daily

---

<sup>1</sup> PCNSL: primary central nervous system lymphoma; PVRL: primary vitreoretinal lymphoma

“-“: not applicable

### 2.3. Risk of bias

Supplementary Table S2.2.2. Risk of bias of included case control studies assessed by the Newcastle-Ottawa Scale

| Study ID            | Selection                        |                                 |                        |                                                                          | Comparability                            |                                          | Exposure                  |                                                     |                   | Total score |
|---------------------|----------------------------------|---------------------------------|------------------------|--------------------------------------------------------------------------|------------------------------------------|------------------------------------------|---------------------------|-----------------------------------------------------|-------------------|-------------|
|                     | Is the case definition adequate? | Representativeness of the cases | Select ion of Controls | Demonstration that outcome of interest was not present at start of study | Study controls the most important factor | Study controls for any additional factor | Ascertainment of exposure | Same method of ascertainment for cases and controls | Non-Response rate |             |
| Binnahil M et al[2] | Yes                              | No                              | Yes                    | Yes                                                                      | No                                       | No                                       | Yes                       | Yes                                                 | Yes               | 6           |
| Porter AB et al[6]  | Yes                              | No                              | Yes                    | Yes                                                                      | No                                       | No                                       | Yes                       | Yes                                                 | Yes               | 6           |

Supplementary Table S2.2.3. Risk of bias of included case series assessed by the Institute of Health Economics checklist

| Study ID | Study objective                                                | Study population                                                             |                                                    |                                                                       |                                            | Intervention and co-intervention                                    |                                                      |                                                                         |
|----------|----------------------------------------------------------------|------------------------------------------------------------------------------|----------------------------------------------------|-----------------------------------------------------------------------|--------------------------------------------|---------------------------------------------------------------------|------------------------------------------------------|-------------------------------------------------------------------------|
|          | Is the hypothesis, aim, objective of the study clearly stated? | Are the characteristics of the participants included in the study described? | Were the cases collected in more than one centre ? | Are the eligibility criteria for entry into the study clearly stated? | Were participants recruited consecutively? | Did participants enter the study at a similar point in the disease? | Was the intervention of interest clearly described ? | Were additional interventions (co-interventions) reported in the study? |



|                    |     |     |    |     |         |    |     |    |
|--------------------|-----|-----|----|-----|---------|----|-----|----|
| Bullis CL et al[1] | Yes | Yes | No | Yes | Unclear | No | Yes | No |
| Onder E et al[3]   | Yes | Yes | No | Yes | Unclear | No | Yes | No |
| Manoj N et al[4]   | Yes | Yes | No | Yes | Unclear | No | No  | No |
| Zhao H et al[5]    | Yes | Yes | No | Yes | Unclear | No | Yes | No |

Continued Supplementary Table S2.2.3

| Study ID           | Outcome measure                                |                                                                                           |                                                                        | Statistical analysis                                                         | Results and conclusions               |                                     |
|--------------------|------------------------------------------------|-------------------------------------------------------------------------------------------|------------------------------------------------------------------------|------------------------------------------------------------------------------|---------------------------------------|-------------------------------------|
|                    | Are the outcome measures established a priori? | Were the relevant outcomes measured with appropriate objective and/or subjective methods? | Were the relevant outcomes measured before and after the intervention? | Were the statistical tests used to assess the relevant outcomes appropriate? | Was the length of follow-up reported? | Was the loss to follow-up reported? |
| Bullis CL et al[1] | Yes                                            | Yes                                                                                       | No                                                                     | No                                                                           | No                                    | Yes                                 |
| Onder E et al[3]   | Yes                                            | Yes                                                                                       | No                                                                     | No                                                                           | No                                    | Yes                                 |
| Manoj N et al[4]   | Yes                                            | Yes                                                                                       | No                                                                     | No                                                                           | No                                    | Yes                                 |
| Zhao H et al[5]    | Yes                                            | Yes                                                                                       | No                                                                     | No                                                                           | No                                    | Yes                                 |

Continued Supplementary Table 2.2.3

| Study ID | Results and conclusions |                 |                   | Competing interest and source of support | New items     |                   | Total score |
|----------|-------------------------|-----------------|-------------------|------------------------------------------|---------------|-------------------|-------------|
|          | Does the study          | Are the adverse | Are the conclusio | Are both competing interests and sources | Was the study | Were the relevant |             |

|                    | provide estimates of the random variability in the data analysis of relevant outcomes? | events related with the intervention reported? | consistency of the study supported by results? | adequacy of support for the study reported? | was the study conducted prospectively? | outcomes assessed blinded to intervention status? |   |
|--------------------|----------------------------------------------------------------------------------------|------------------------------------------------|------------------------------------------------|---------------------------------------------|----------------------------------------|---------------------------------------------------|---|
| Bullis CL et al[1] | No                                                                                     | No                                             | Yes                                            | Yes                                         | No                                     | No                                                | 9 |
| Onder E et al[3]   | No                                                                                     | No                                             | Yes                                            | Yes                                         | No                                     | No                                                | 9 |
| Manoj N et al[4]   | No                                                                                     | No                                             | Yes                                            | Yes                                         | No                                     | No                                                | 8 |
| Zhao H et al[5]    | No                                                                                     | No                                             | Yes                                            | No                                          | No                                     | No                                                | 8 |

Supplementary Table S2.2.4. JBI Critical Appraisal Checklist for Case Reports

| Study ID           | patient's demographic characteristics | patient's history | current clinical condition | diagnostic tests | intervention(s) | post-intervention clinical condition | adverse events | takeaway lessons | Total score |
|--------------------|---------------------------------------|-------------------|----------------------------|------------------|-----------------|--------------------------------------|----------------|------------------|-------------|
| Choi YL et al[7]   | Yes                                   | Yes               | Yes                        | Yes              | Yes             | Yes                                  | No             | Yes              | 7           |
| Geppert M et al[8] | Yes                                   | Yes               | Yes                        | Yes              | Yes             | Yes                                  | No             | Yes              | 7           |

## 2.4 Reference

- [1] Bullis CL, Maldonado-Perez A, Bowden SG, et al. Diagnostic impact of preoperative corticosteroids in primary central nervous system lymphoma. *J Clin Neurosci.* 2020;72:287-291.
- [2] Binnahil M, Au K, Lu JQ, Wheatley BM, Sankar T. The Influence of Corticosteroids on Diagnostic Accuracy of Biopsy for Primary Central Nervous System Lymphoma. *Can J Neurol Sci.* 2016;43(5):721-725.
- [3] Önder E, Arıkök AT, Önder S, et al. Corticosteroid pre-treated primary CNS lymphoma: a detailed analysis of stereotactic biopsy findings and consideration of interobserver variability. *Int J Clin Exp Pathol.* 2015;8(7):7798-7808.
- [4] Manoj N, Arivazhagan A, Mahadevan A, et al. Central nervous system lymphoma: patterns of incidence in Indian population and effect of steroids on stereotactic biopsy yield. *Neurol India.* 2014;62(1):19-25.
- [5] Zhao, H., Tian, Z., Liu, R., et al., Effect of corticosteroid administration before biopsy on histopathological diagnosis of primary central nervous system lymphoma. *Chin J Lab Diagn.* 2011;15(5):828-829.
- [6] Porter AB, Giannini C, Kaufmann T, et al. Primary central nervous system lymphoma can be histologically diagnosed after previous corticosteroid use: a pilot study to determine whether corticosteroids prevent the diagnosis of primary central nervous system lymphoma. *Ann Neurol.* 2008;63(5):662-667.
- [7] Choi YL, Suh YL, Kim D, Ko YH, Sung CO, Lee JI. Malignant lymphoma of the central nervous system: difficult histologic diagnosis after glucocorticoid therapy prior to biopsy. *Clin Neuropathol.* 2006;25(1):29-36.
- [8] Geppert M, Ostertag CB, Seitz G, Kiessling M. Glucocorticoid therapy obscures the diagnosis of cerebral lymphoma. *Acta Neuropathol.* 1990;80(6):629-634.

**CQ 3. Which is the preferred imaging examination for PCNSL patients, MRI or whole-body PET-CT?**

- ⑩ Population: Patients with PCNSL
- ⑩ Intervention: Imaging examination by MRI
- ⑩ Comparison: Imaging examination by whole-body PET-CT

**3.1. Inclusion and exclusion criteria**

- ⑩ inclusion criteria: we included published studies, which compared the sensitivity and specificity for a PCNSL patient MRI and whole-body.
- ⑩ exclusion criteria: we excluded studies where we failed to access full text, or studies without sufficient data.

**3.2. Characteristic information of included studies**

We didn't identify any study met the inclusion criteria.

#### **CQ 4. Should cognitive function assessment be used for PCNSL patients?**

- ⑩ Population: Patients with PCNSL
- ⑩ Intervention: cognitive function assessment
- ⑩ Comparison: no treatment

##### **4.1. Inclusion and exclusion criteria**

- ⑩ inclusion criteria: we only included published RCTs, the benefits of cognitive function evaluation for patients were studied. Studies published in English and Chinese are included.
- ⑩ exclusion criteria: we excluded studies where we failed to access full text, or studies without sufficient data.

#### 4.2. Characteristic information of included studies

Supplementary Table 2.4.1 characteristic information of included studies

| Study ID      | Years | Country     | Research type         | Disease Stage   | N   | Intervention                     | Comparison            |
|---------------|-------|-------------|-----------------------|-----------------|-----|----------------------------------|-----------------------|
| Meulen [1]    | 2018  | Netherlands | Systematic review     | newly diagnosed | /   | cognitive functioning and HRQOL  | /                     |
| Correa [2]    | 2007  | America     | Systematic review     | /               | /   | cognitive functioning            | /                     |
| Houillier [3] | 2019  | French      | RCT                   | /               | 140 | WBRT                             | ASCT                  |
| Meulen [4]    | 2021  | Netherlands | RCT                   | /               | 199 | standard chemotherapy+ rituximab | standard chemotherapy |
| Aaronson [5]  | 1993  | England     | Cross-sectional study | /               | 305 | /                                | /                     |

/: none

### 4.3. Risk of bias

Supplementary Table 2.4.2. Risk of bias of included systematic reviews assessed by the AMSTAR

| Study ID     | Was an 'a priori' design provided? | Was there duplicate study selection and data extraction? | Was a comprehensive literature search performed? | Was the status of publication (i.e. grey literature) used as an inclusion criterion? | Was a list of studies (included and excluded) provided? | Were the characteristics of the included studies provided? | Was the scientific quality of the included studies assessed and documented? | Was the scientific quality of the included studies used appropriately in formulating conclusions? | Were the methods used to combine the findings of studies appropriate? | Was the likelihood of publication bias assessed? | Was the likelihood of publication bias assessed? |
|--------------|------------------------------------|----------------------------------------------------------|--------------------------------------------------|--------------------------------------------------------------------------------------|---------------------------------------------------------|------------------------------------------------------------|-----------------------------------------------------------------------------|---------------------------------------------------------------------------------------------------|-----------------------------------------------------------------------|--------------------------------------------------|--------------------------------------------------|
| Meulen [1]   | No                                 | Yes                                                      | Yes                                              | Yes                                                                                  | No                                                      | Yes                                                        | Yes                                                                         | Yes                                                                                               | Yes                                                                   | No                                               | Yes                                              |
| Correa [2]   | No                                 | Yes                                                      | Yes                                              | No                                                                                   | No                                                      | Yes                                                        | Yes                                                                         | Yes                                                                                               | Yes                                                                   | No                                               | Yes                                              |
| Aaronson [5] | No                                 | Yes                                                      | Yes                                              | Yes                                                                                  | No                                                      | Yes                                                        | Yes                                                                         | Yes                                                                                               | Yes                                                                   | No                                               | Yes                                              |

Supplementary Table S2.4.3. Risk of bias of included RCTs assessed by the Cochrane Risk of Bias tool

| Study ID | Random sequence generation (selection bias) | Allocation concealment (selection bias) | Blinding of participants and researchers | Blinding of outcome assessment (detection bias) | Incomplete outcome data (attrition bias) | Selective reporting (reporting bias) | Other bias |
|----------|---------------------------------------------|-----------------------------------------|------------------------------------------|-------------------------------------------------|------------------------------------------|--------------------------------------|------------|
|----------|---------------------------------------------|-----------------------------------------|------------------------------------------|-------------------------------------------------|------------------------------------------|--------------------------------------|------------|

|                 |         |         |                    |             |         |         |         |
|-----------------|---------|---------|--------------------|-------------|---------|---------|---------|
|                 |         |         | (performance bias) |             |         |         |         |
| Meulen 2021 [4] | Low ROB | Low ROB | Unclear ROB        | Unclear ROB | Low ROB | Low ROB | Low ROB |
| Meulen [4]      | Low ROB | Low ROB | Unclear ROB        | Unclear ROB | Low ROB | Low ROB | Low ROB |

Note: ROB: risk of bias.

Supplementary Table S2.4.4. Risk of bias of included Cross-sectional study assessed by the JBI Critical Appraisal Tools

| Study ID     | Were the criteria for inclusion in the sample clearly defined? | Were the study subjects and the setting described in detail? | Was the exposure measured in a valid and reliable way? | Were objective, standard criteria used for measurement of the condition? | Were confounding factors identified? | Were strategies to deal with confounding factors stated? | Were the outcomes measured in a valid and reliable way? | Was appropriate statistical analysis used? | Adequacy of follow up of cohorts |
|--------------|----------------------------------------------------------------|--------------------------------------------------------------|--------------------------------------------------------|--------------------------------------------------------------------------|--------------------------------------|----------------------------------------------------------|---------------------------------------------------------|--------------------------------------------|----------------------------------|
| Aaronson [5] | Yes                                                            | Yes                                                          | Yes                                                    | Yes                                                                      | Yes                                  | No                                                       | Yes                                                     | Yes                                        | Yes                              |



#### 4.4. Reference

- [1] van der Meulen, M., Dirven, L., Habets, E.J.J., et al., Cognitive functioning and health-related quality of life in patients with newly diagnosed primary CNS lymphoma: a systematic review. *The Lancet Oncology*, 2018. 19(8): p. e407-e418 DOI: 10.1016/s1470-2045(18)30356-5.
- [2] Correa, D.D., Maron, L., Harder, H., et al., Cognitive functions in primary central nervous system lymphoma: literature review and assessment guidelines. *Ann Oncol*, 2007. 18(7): p. 1145-51 DOI: 10.1093/annonc/mdl464.
- [3] Houillier, C., Taillandier, L., Dureau, S., et al., Radiotherapy or Autologous Stem-Cell Transplantation for Primary CNS Lymphoma in Patients 60 Years of Age and Younger: Results of the Intergroup ANOCEF-GOELAMS Randomized Phase II PRECIS Study. *J Clin Oncol*, 2019. 37(10): p. 823-833 DOI: 10.1200/JCO.18.00306.
- [4] van der Meulen, M., Dirven, L., Habets, E.J.J., et al., Neurocognitive functioning and radiologic changes in primary CNS lymphoma patients: results from the HOVON 105/ALLG NHL 24 randomized controlled trial. *Neuro Oncol*, 2021. 23(8): p. 1315-1326 DOI: 10.1093/neuonc/noab021.
- [5] Aaronson, N.K., Ahmedzai, S., Bergman, B., et al., The European Organization for Research and Treatment of Cancer QLQ-C30: a quality-of-life instrument for use in international clinical trials in oncology. *J Natl Cancer Inst*, 1993. 85(5): p. 365-76 DOI: 10.1093/jnci/85.5.365.

**CQ 5. What needs to be recommended as the combined regimen with HD-MTX backbone in induction therapy?**

- ⑩ Population: Patients with PCNSL
- ⑩ Intervention: Combined regimen with HD-MTX
- ⑩ Comparison: Other combined regimens with or without HD-MTX

**5.1. Inclusion and exclusion criteria**

- ⑩ inclusion criteria: we only included published RCTs, which compared combined regimen with HD-MTX vs other combined regimens. Studies published in English and Chinese are included.
- ⑩ exclusion criteria: we excluded studies where we failed to access full text, or studies without sufficient data.

## 5.2. Characteristic information of included studies

Supplementary Table S2.5.1 characteristic information of included studies

| Study ID          | Publication year | Country                                   | N   | intervention 1 |                               |                                                                                                                                                                                                                                               | intervention 2 |                   |                                                                                                                                                                               | Intervention 3 |                   |                            |
|-------------------|------------------|-------------------------------------------|-----|----------------|-------------------------------|-----------------------------------------------------------------------------------------------------------------------------------------------------------------------------------------------------------------------------------------------|----------------|-------------------|-------------------------------------------------------------------------------------------------------------------------------------------------------------------------------|----------------|-------------------|----------------------------|
|                   |                  |                                           |     | n              | Intervention name             | Treatment (dose, duration)                                                                                                                                                                                                                    | n              | Intervention name | Treatment (dose, duration)                                                                                                                                                    | n              | Intervention name | Treatment (dose, duration) |
| Bromberg et al[1] | 2019             | Netherlands, Australia, New Zealand       | 200 | 99             | R-MBVP <sup>1</sup>           | -d1+d15: MTX: 3g/m <sup>2</sup> ; d2+d3: teniposide: 100mg/m <sup>2</sup> ; d4: carmustine: 100mg/m <sup>2</sup> ; d1-5: prednisone: 60mg/m <sup>2</sup> ; c1: d0+d7+d14+d21/c2: d0+d14: rituximab: 375mg/m <sup>2</sup> -28d/cycle, 2 cycles | 100            | MBVP              | -d1+d15: MTX: 3g/m <sup>2</sup> ; d2+d3: teniposide: 100mg/m <sup>2</sup> ; d4: carmustine: 100mg/m <sup>2</sup> ; d1-5: prednisone: 60mg/m <sup>2</sup> -28d/cycle, 2 cycles | -              | -                 | -                          |
| Ferreri et al[2]  | 2009             | Argentina, Greece, Italy, Peru, Portugal, | 79  | 39             | MTX <sup>2</sup> + cytarabine | -d1: MTX: 3.5g/m <sup>2</sup> ; d2-3: cytarabine: 2g/m <sup>2</sup> , twice a day -3w/course, 4                                                                                                                                               | 40             | MTX               | -d1: MTX:3.5g/m <sup>2</sup> -3w/course, 4 courses                                                                                                                            | -              | -                 | -                          |





|                |      |       |    |    |                                             |                                                                                                                                                          |    |                                                        |                                                                                                                                                                                                                                                                                                                 |    |            |                           |
|----------------|------|-------|----|----|---------------------------------------------|----------------------------------------------------------------------------------------------------------------------------------------------------------|----|--------------------------------------------------------|-----------------------------------------------------------------------------------------------------------------------------------------------------------------------------------------------------------------------------------------------------------------------------------------------------------------|----|------------|---------------------------|
| Luo et al[8]   | 2016 | China | 58 | 29 | MTX + Rituximab                             | -Rituximab: 375mg/m <sup>2</sup> ; MTX: 3g/m <sup>2</sup> -4w/cycle, 2-6 cycles                                                                          | 29 | MTX + WBRT                                             | total; MTX: d1:3.0g/m <sup>2</sup> -28d/cycle<br>MTX: 3g/m <sup>2</sup> ; WBRT: 1.8-2.0Gy a time, 5 times/w -4w/cycle, 2-6 cycles<br>WBRT: 40-45Gy in total, 1.8-2.0Gy a time, 5 times/w, 20 times; 3-dimensional conformal radiation therapy: 8-16Gy in total, 4Gy a time; MTX: 3.0g/m <sup>2</sup> -28d/cycle | -  | -          | -                         |
| Sun et al[9]   | 2017 | China | 52 | 26 | MTX + Rituximab + cytarabine                | -d1: Rituximab: 375mg/m <sup>2</sup> ; d2: MTX: 3g/m <sup>2</sup> ; d3: cytarabine: 0.5-1.0g/m <sup>2</sup> -21d                                         | 26 | MTX + WBRT + 3-dimensional conformal radiation therapy |                                                                                                                                                                                                                                                                                                                 | -  | -          | -                         |
| Song et al[10] | 2018 | China | 91 | 31 | MTX + Rituximab + cytarabine+ Dexamethasone | -d1: Rituximab: 375mg/m <sup>2</sup> ; d2:HD-MTX: 3.5g/m <sup>2</sup> ; d3: cytarabine: 0.5-1.0g/m <sup>2</sup> ; d2-4: dexamethasone: 10mg -4-6 courses | 30 | MTX + Rituximab                                        | Rituximab: 375mg/m <sup>2</sup> /w; MTX:3.5g/m <sup>2</sup> /w -4w/course, 4 courses                                                                                                                                                                                                                            | 30 | MTX + WBRT | MTX: 3.5mg/m <sup>2</sup> |

|                 |      |       |     |    |                                          |                                                                                                                                                |    |                    |                                                                                           |   |   |   |
|-----------------|------|-------|-----|----|------------------------------------------|------------------------------------------------------------------------------------------------------------------------------------------------|----|--------------------|-------------------------------------------------------------------------------------------|---|---|---|
| Shan et al[11]  | 2019 | China | 120 | 60 | MTX + Rituximab                          | -MTX: 3g/m <sup>2</sup> ; Rituximab: 375mg/m <sup>2</sup> -4w/course, 4-6 courses                                                              | 60 | MTX + WBRT         | MTX: 3g/m <sup>2</sup> ; WBRT: 1.8-2.0Gy a time, 5 times/w -4w/course, 4-6 courses        | - | - | - |
| Wang et al[12]  | 2016 | China | 60  | 30 | MTX + Rituximab                          | -MTX: 3g/m <sup>2</sup> ; Rituximab: 375mg/m <sup>2</sup> -4 cycles                                                                            | 30 | MTX + WBRT         | MTX:3g/m <sup>2</sup> ; WBRT -1m/cycle, 4 cycles                                          | - | - | - |
| Zhang et al[13] | 2018 | China | 54  | 27 | MTX + Rituximab + WBRT                   | -MTX: 3g/m <sup>2</sup> ; WBRT: 2.0Gy a time, 5 times/w, <36Gy in total; Rituximab: 375mg/m <sup>2</sup> -1m/cycle, 4 cycles                   | 27 | MTX + WBRT         | -MTX:3g/m <sup>2</sup> ; WBRT:2.0Gy a time, 5 times/w, <36Gy in total -1m/cycle, 4 cycles | - | - | - |
| Wu et al[14]    | 2018 | China | 49  | 24 | Fotemustine + teniposide + dexamethasone | -d1: Fotemustine: 100mg/m <sup>2</sup> , 1h; d2-4: teniposide: 60mg/m <sup>2</sup> , >0.5h; d1-5: dexamethasone: 40mg, 1h -21d/cycle, 4 cycles | 25 | HD-MA <sup>4</sup> | -d1: MTX:3.5g/m <sup>2</sup> ; d2-3: cytarabine: 1.0g/m <sup>2</sup> -21d/cycle, 4 cycles | - | - | - |
| Huang et al[15] | 2017 | China | 48  | 24 | MTX + temozolomide                       | -d1:MTX: 3g/m <sup>2</sup> ; d2-6: temozolomide                                                                                                | 24 | MTX + WBRT         | -d1: MTX:3.0g/m <sup>2</sup> ; WBRT: 36Gy                                                 | - | - | - |

|              |      |       |    |    |            |                                                                              |    |            |                                                                             |   |   |   |
|--------------|------|-------|----|----|------------|------------------------------------------------------------------------------|----|------------|-----------------------------------------------------------------------------|---|---|---|
|              |      |       |    |    |            | : 150mg/m <sup>2</sup><br>-21d/cycle, 6-8 cycles                             |    |            | in total, 2Gy a time, 5 times/w<br>-21d/cycle, 6-8 cycles                   |   |   |   |
| Yi et al[16] | 2014 | China | 42 | 21 | MTX + WBRT | -MTX: 1g/m <sup>2</sup> ; WBRT: 2Gy a time, 5 times/w<br>-3w/cycle, 8 cycles | 21 | MTX + WBRT | -MTX: 3g/m <sup>2</sup> ; WBRT:2Gy a time, 5 times/w<br>-3w/cycle, 8 cycles | - | - | - |

<sup>1</sup>R-MBVP: methotrexate, carmustine, teniposide, and prednisone (MBVP) plus rituximab

<sup>2</sup>MTX: methotrexate

<sup>3</sup>WBRT: whole brain radiation therapy

<sup>4</sup>HD-MA: high-dose methotrexate plus cytarabine

“-“: not applicable



### 5.3. Risk of bias

| Study         | Random sequence generation (selection bias) | Allocation concealment (selection bias) | Blinding of participants and personnel (performance bias) | Blinding of outcome assessment (detection bias) | Incomplete outcome data (attrition bias) | Selective reporting (reporting bias) | Other bias |
|---------------|---------------------------------------------|-----------------------------------------|-----------------------------------------------------------|-------------------------------------------------|------------------------------------------|--------------------------------------|------------|
| Bromberg 2019 | +                                           | +                                       | -                                                         | +                                               | +                                        | +                                    | +          |
| Ferri 2016    | +                                           | +                                       | -                                                         | +                                               | +                                        | +                                    | +          |
| Ferri 2021    | +                                           | -                                       | -                                                         | +                                               | +                                        | +                                    | +          |
| He 2016       | +                                           | ?                                       | ?                                                         | +                                               | ?                                        | +                                    | +          |
| Huang 2017    | ?                                           | ?                                       | ?                                                         | +                                               | ?                                        | +                                    | +          |
| Li 2019       | ?                                           | ?                                       | ?                                                         | +                                               | ?                                        | +                                    | +          |
| LUO 2016      | ?                                           | ?                                       | ?                                                         | +                                               | ?                                        | +                                    | +          |
| Omuro 2015    | +                                           | -                                       | -                                                         | +                                               | +                                        | +                                    | +          |
| Shan2019      | +                                           | ?                                       | ?                                                         | +                                               | ?                                        | +                                    | +          |
| Song2018      | +                                           | ?                                       | ?                                                         | +                                               | +                                        | +                                    | +          |
| Sun 2017      | ?                                           | ?                                       | ?                                                         | +                                               | ?                                        | +                                    | +          |
| Thiel 2010    | +                                           | -                                       | -                                                         | +                                               | +                                        | +                                    | +          |
| Wang 2016     | ?                                           | ?                                       | ?                                                         | +                                               | ?                                        | +                                    | +          |
| Wu 2018       | +                                           | -                                       | -                                                         | +                                               | ?                                        | +                                    | +          |
| Yi 2014       | ?                                           | ?                                       | ?                                                         | +                                               | ?                                        | +                                    | +          |
| Zhang 2018    | +                                           | ?                                       | ?                                                         | +                                               | ?                                        | +                                    | +          |

Supplementary Figure S2.5.1. Risk of bias of included studies assessed by the Cochrane Risk of Bias tool

## 5.4. Meta-analysis results

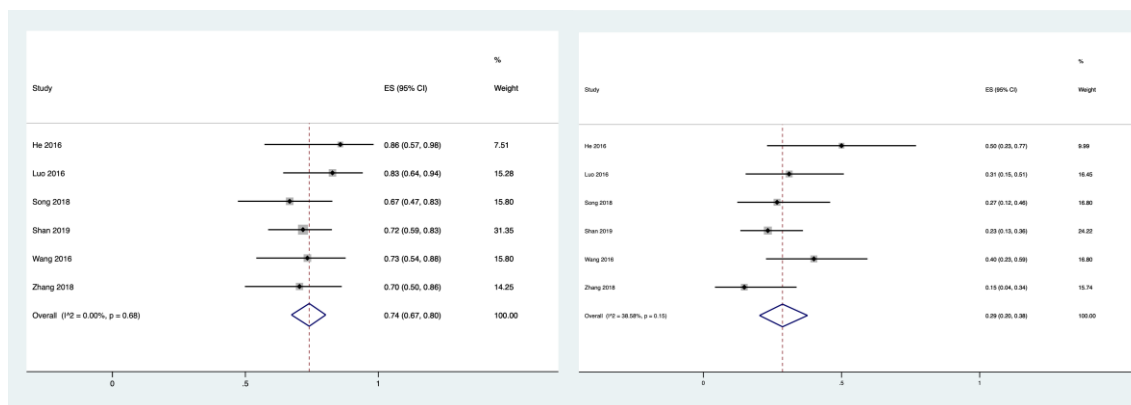

Supplementary Figure S2.5.2. Pooled results of MTX + rituximab (ORR on the left, CR on the right)

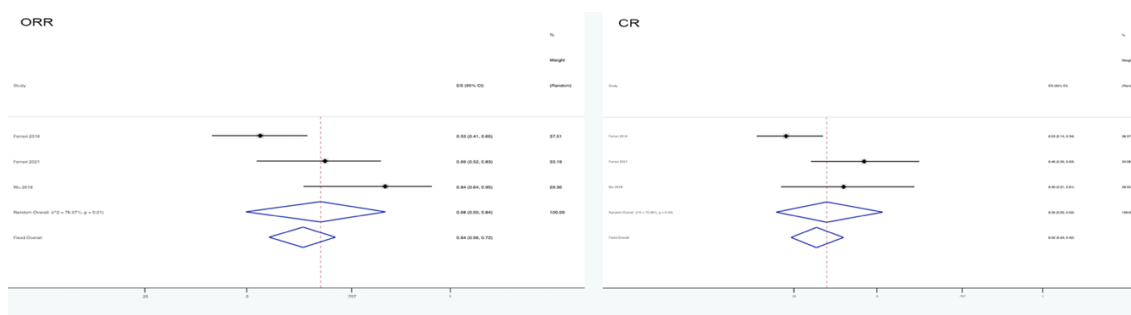

Supplementary Figure S2.5.3. Pooled results of MTX + cytarabine (ORR on the left, CR on the right)

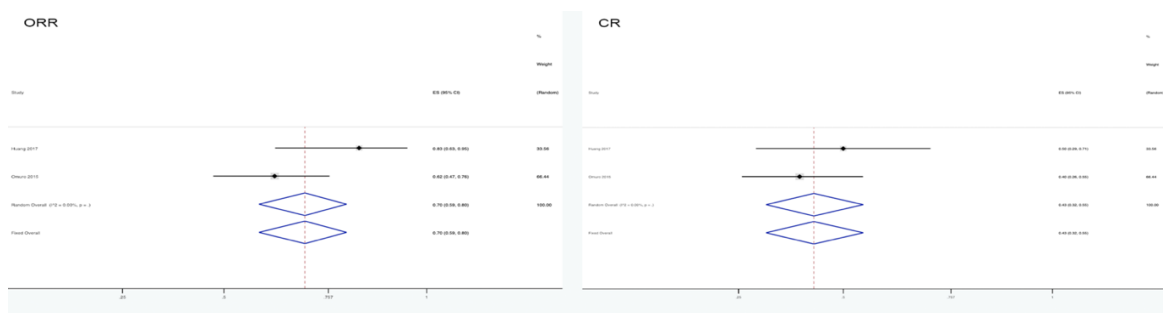

Supplementary Figure S2.5.4. Pooled results of MTX + temozolomide (ORR on the left, CR on the right)

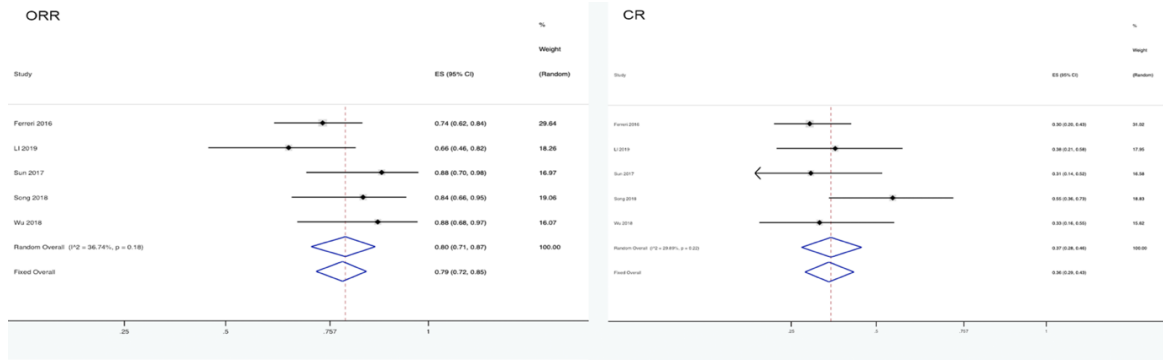

Supplementary Figure S2.5.5. Pooled results of triple therapy with HD-MTX (ORR on the left, CR on the right)

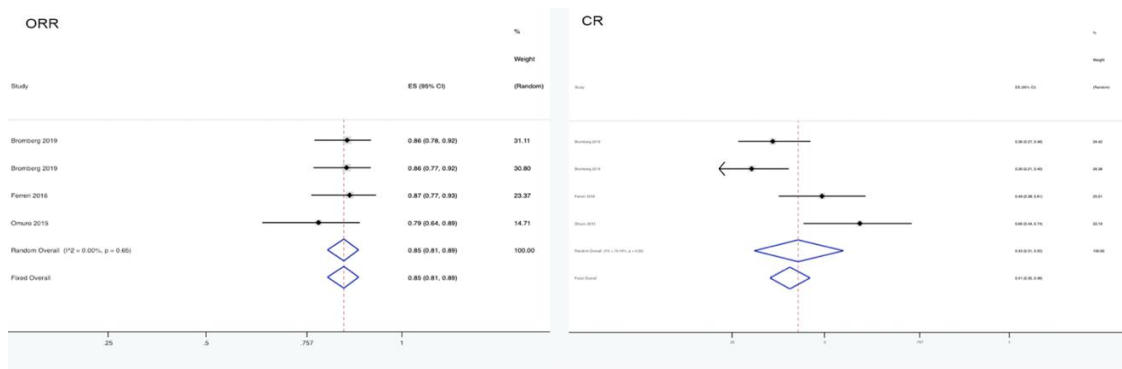

Supplementary Figure S2.5.6. Pooled results of four regimen with HD-MTX (ORR on the left, CR on the right)

| Study or Subgroup                                                                                    | HD-MTX+rituximab |            | rituximab-free |            | Weight        | Risk Ratio               |                    |
|------------------------------------------------------------------------------------------------------|------------------|------------|----------------|------------|---------------|--------------------------|--------------------|
|                                                                                                      | Events           | Total      | Events         | Total      |               | M-H, Fixed, 95% CI       | M-H, Fixed, 95% CI |
| <b>1.1.1 MTX+RTX vs MTX+WBRT</b>                                                                     |                  |            |                |            |               |                          |                    |
| He 2016                                                                                              | 12               | 14         | 7              | 14         | 2.6%          | 1.71 [0.97, 3.02]        |                    |
| Luo 2016                                                                                             | 24               | 29         | 17             | 29         | 6.4%          | 1.41 [1.00, 2.00]        |                    |
| Shan 2019                                                                                            | 43               | 60         | 28             | 60         | 10.6%         | 1.54 [1.12, 2.10]        |                    |
| Song 2018                                                                                            | 20               | 30         | 16             | 30         | 6.1%          | 1.25 [0.82, 1.90]        |                    |
| Wang 2016                                                                                            | 22               | 30         | 20             | 30         | 7.6%          | 1.10 [0.79, 1.53]        |                    |
| Zhang 2018                                                                                           | 19               | 27         | 10             | 27         | 3.8%          | 1.90 [1.10, 3.29]        |                    |
| <b>Subtotal (95% CI)</b>                                                                             |                  | <b>190</b> |                | <b>190</b> | <b>37.1%</b>  | <b>1.43 [1.22, 1.68]</b> |                    |
| Total events                                                                                         | 140              |            | 98             |            |               |                          |                    |
| Heterogeneity: Chi <sup>2</sup> = 4.40, df = 5 (P = 0.49); I <sup>2</sup> = 0%                       |                  |            |                |            |               |                          |                    |
| Test for overall effect: Z = 4.33 (P < 0.0001)                                                       |                  |            |                |            |               |                          |                    |
| <b>1.1.2 MTX+RTX+Ara-C vs MTX+WBRT/Ara-C</b>                                                         |                  |            |                |            |               |                          |                    |
| Ferreri 2016                                                                                         | 51               | 69         | 40             | 75         | 14.5%         | 1.39 [1.08, 1.79]        |                    |
| Li 2019                                                                                              | 19               | 29         | 10             | 29         | 3.8%          | 1.90 [1.08, 3.35]        |                    |
| Song 2018                                                                                            | 26               | 31         | 16             | 30         | 6.2%          | 1.57 [1.09, 2.27]        |                    |
| Sun 2017                                                                                             | 23               | 26         | 16             | 26         | 6.1%          | 1.44 [1.03, 2.01]        |                    |
| <b>Subtotal (95% CI)</b>                                                                             |                  | <b>155</b> |                | <b>160</b> | <b>30.5%</b>  | <b>1.50 [1.26, 1.78]</b> |                    |
| Total events                                                                                         | 119              |            | 82             |            |               |                          |                    |
| Heterogeneity: Chi <sup>2</sup> = 1.16, df = 3 (P = 0.76); I <sup>2</sup> = 0%                       |                  |            |                |            |               |                          |                    |
| Test for overall effect: Z = 4.58 (P < 0.00001)                                                      |                  |            |                |            |               |                          |                    |
| <b>1.1.3 MBVP+RTX vs MBVP</b>                                                                        |                  |            |                |            |               |                          |                    |
| Bromberg 2019                                                                                        | 85               | 99         | 86             | 100        | 32.4%         | 1.00 [0.89, 1.12]        |                    |
| <b>Subtotal (95% CI)</b>                                                                             |                  | <b>99</b>  |                | <b>100</b> | <b>32.4%</b>  | <b>1.00 [0.89, 1.12]</b> |                    |
| Total events                                                                                         | 85               |            | 86             |            |               |                          |                    |
| Heterogeneity: Not applicable                                                                        |                  |            |                |            |               |                          |                    |
| Test for overall effect: Z = 0.03 (P = 0.98)                                                         |                  |            |                |            |               |                          |                    |
| <b>Total (95% CI)</b>                                                                                |                  | <b>444</b> |                | <b>450</b> | <b>100.0%</b> | <b>1.31 [1.20, 1.43]</b> |                    |
| Total events                                                                                         | 344              |            | 266            |            |               |                          |                    |
| Heterogeneity: Chi <sup>2</sup> = 30.43, df = 10 (P = 0.0007); I <sup>2</sup> = 67%                  |                  |            |                |            |               |                          |                    |
| Test for overall effect: Z = 5.89 (P < 0.00001)                                                      |                  |            |                |            |               |                          |                    |
| Test for subgroup differences: Chi <sup>2</sup> = 21.09, df = 2 (P < 0.0001), I <sup>2</sup> = 90.5% |                  |            |                |            |               |                          |                    |

Supplementary Figure S2.5.7. Pooled ORR of HD-MTX based regimen with or without rituximab

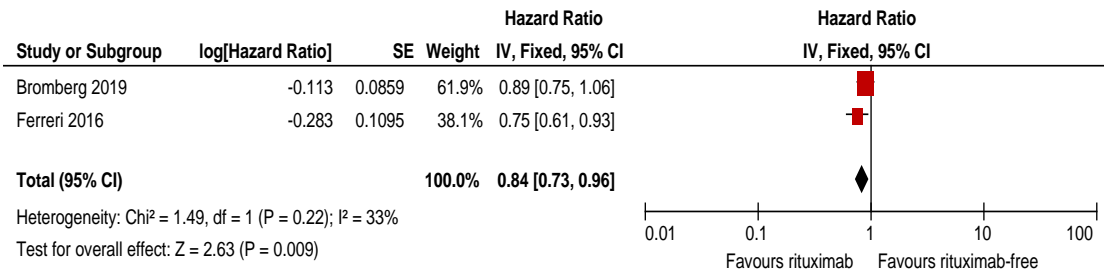

Supplementary Figure S2.5.8. Pooled PFS of HD-MTX based combined regimen with or without rituximab

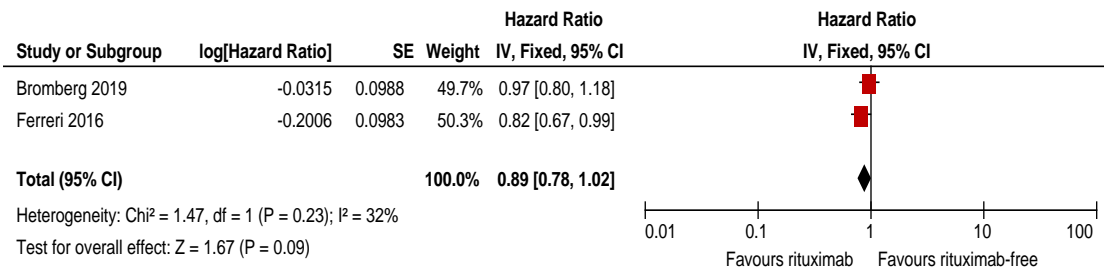

Supplementary Figure S2.5.9. Pooled OS of HD-MTX based combined regimen with or without rituximab

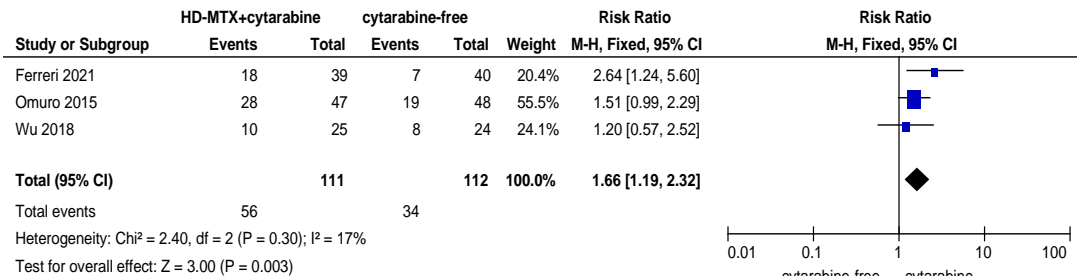

Supplementary Figure S2.5.10 Pooled ORR of HD-MTX based combined regimen with or without Cytarabine

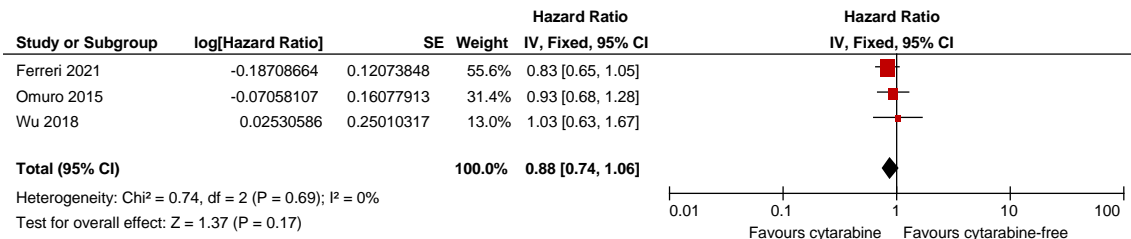

Supplementary Figure S2.5.11 Pooled OS of HD-MTX based combined regimen with or without Cytarabine

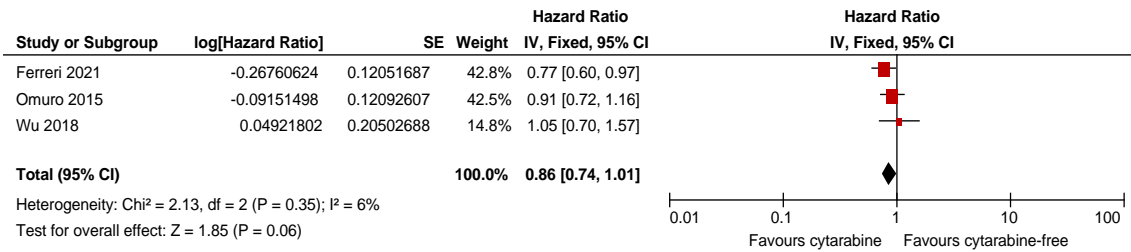

Supplementary Figure S2.5.12 Pooled PFS of HD-MTX based combined regimen with or without Cytarabine

## 5.5. Summary of finding (SoF) tables

| Outcomes                          | Anticipated absolute effects* (95% CI) |                          | Relative effect (95% CI) | No of participants (studies) | Certainty of the evidence (GRADE) | Comments |
|-----------------------------------|----------------------------------------|--------------------------|--------------------------|------------------------------|-----------------------------------|----------|
|                                   | Risk with [comparison]                 | Risk with [intervention] |                          |                              |                                   |          |
| MTX + rituximab vs MTX + WBRT ORR | 586 per 1,000                          | 0 per 1,000 (0 to 0)     | not estimable            | 526 (8 studies)              | ⊕⊕⊕○<br>Moderate <sup>a</sup>     |          |
| MTX + rituximab vs MTX ORR        | 609 per 1,000                          | 0 per 1,000 (0 to 0)     | not estimable            | 1094 (14 studies)            | ⊕⊕○○<br>Low <sup>a,b</sup>        |          |
| MTX + cytarabine vs MTX ORR       | 304 per 1,000                          | 0 per 1,000 (0 to 0)     | not estimable            | 223 (3 studies)              | ⊕⊕⊕○<br>Moderate <sup>c</sup>     |          |

\*The risk in the intervention group (and its 95% confidence interval) is based on the assumed risk in the comparison group and the relative effect of the intervention (and its 95% CI).

CI: confidence interval

### GRADE Working Group grades of evidence

**High certainty:** we are very confident that the true effect lies close to that of the estimate of the effect.

**Moderate certainty:** we are moderately confident in the effect estimate: the true effect is likely to be close to the estimate of the effect, but there is a possibility that it is substantially different.

**Low certainty:** our confidence in the effect estimate is limited: the true effect may be substantially different from the estimate of the effect.

**Very low certainty:** we have very little confidence in the effect estimate: the true effect is likely to be substantially different from the estimate of effect.

### Explanation

a. the risk of bias in many items is unclear; b.  $I^2=65$ ; c. the simple size is under 300

## 5.6. Reference

- [1] Bromberg JEC, Issa S, Bakunina K, et al. Rituximab in patients with primary CNS lymphoma (HOVON 105/ALLG NHL 24): a randomised, open-label, phase 3 intergroup study. *Lancet Oncology*. 2019;20:216-228.
- [2] Ferreri AJ, Reni M, Foppoli M, et al. High-dose cytarabine plus high-dose methotrexate versus high-dose methotrexate alone in patients with primary CNS lymphoma: a randomised phase 2 trial. *Lancet (london, england)*. 2009;374:1512 - 1520.
- [3] Omuro A, Chinot O, Taillandier L, et al. Methotrexate and temozolomide versus methotrexate, procarbazine, vincristine, and cytarabine for primary CNS lymphoma in an elderly population: an intergroup ANOCEF-GOELAMS randomised phase 2 trial. *The lancet Haematology*. 2015;2:e251 - 9.
- [4] Thiel E, Korfel A, Martus P, et al. High-dose methotrexate with or without whole brain radiotherapy for primary CNS lymphoma (G-PCNSL-SG-1): a phase 3, randomised, non-inferiority trial. *Lancet Oncology*. 2010;11:1036-1047.
- [5] Ferreri AJ, Cwynarski K, Pulczynski E, et al. Chemoimmunotherapy with methotrexate, cytarabine, thiotepa, and rituximab (MATRix regimen) in patients with primary CNS lymphoma: results of the first randomisation of the International Extranodal Lymphoma Study Group-32 (IELSG32) phase 2 trial. *Lancet Haematol*. 2016;3:e217-27.
- [6] He Z. Efficacy of high-dose methotrexate in combination with rituximab in the treatment of primary central nervous system lymphoma. *Chinese Journal of Clinical Rational Drug Use*. 2016;9:51-52.
- [7] Li J. Efficacy of rituximab in combination with chemotherapy in the treatment of primary central nervous system lymphoma. *The Journal of Medical Theory and Practice*. 2019;32:3823-3824.
- [8] Luo W, Ji L, Geng H, et al. Clinical Therapeutic Efficacy of Rituximab Combined with Methotrexate on Primary Central Nervous System Lymphoma. *Journal Of Experimental Hematology*. 2016;24:444-447.
- [9] Sun H, Liu H, Yan J. Therapeutic effect of rituximab combined chemotherapy on primary central nervous system lymphoma. *Journal of Chinese Practical Diagnosis and Therapy*. 2017;31:914-916.
- [10] Song C, Fang B, Cai X. Efficacy of Rituximab Combined with Chemotherapy Regimen in Treatment of Elderly Patients with Primary Central Nervous System Lymphomas. *Journal of Chinese Oncology*. 2018;24.
- [11] Shan X. [Clinical efficacy of high-dose methotrexate in combination with rituximab in the treatment of patients with PCNSL]. *Heilongjiang Medicine Journal*. 2019;32:1364-1366.
- [12] Wang B, Mu P. [Effect of high-dose methotrexate combined with rituximab

- in the treatment of primary CNS lymphoma]. CHINA PRACTICAL MEDICINE. 2016;11:155-156.
- [13]Zhang N. [Clinical effect of rituximab monoclonal antibody plus methotrexate on primary CNS lymphoma]. Laboratory Medicine and Clinic. 2018;15:768-771.
- [14]Wu J, Duan L, Zhang L, et al. Fotemustine, teniposide and dexamethasone versus high-dose methotrexate plus cytarabine in newly diagnosed primary CNS lymphoma: a randomised phase 2 trial. Journal of neuro-oncology. 2018;140:427 - 434.
- [15]Huang X, Wang Y. [Effects of Methotrexate Combined with Temozolomide in Treatment of Primary Central Nervous System Lymphoma]. Neural Injury and Functional Reconstruction. 2017;12:132-134.
- [16]Yi Z. [Efficacy of different doses of methotrexate combined with radiotherapy in the treatment of primary central nervous system lymphoma]. Chinese Journal of Practical Nervous Diseases. 2014;17:120-121.



**CQ 6. Should rituximab be used to treat newly-diagnosed PCNS-DLBCL patients in induction therapy?**

- ⑩ Population: Patients with PCNS-DLBCL
- ⑩ Intervention: Rituximab or rituximab combined standard care
- ⑩ Comparison: Placebo or standard care

**6.1. Inclusion and exclusion criteria**

- ⑩ inclusion criteria: we only included published RCTs and observational studies in patient with PCNS-DLBCL, which compared rituximab (rituximab combined standard care) vs placebo (standard care). Studies published in English and Chinese are included.
- ⑩ exclusion criteria: we excluded studies where we failed to access full text, or studies without sufficient data.

## 6.2. Characteristic information of included studies

Supplementary Table S2.6.1. characteristic information of included studies

| Study ID                     | Country                             | Study design | N   | Intervention group |              |                                                                                                                                                                                                                                                                                                                                                                                             | Control group       |     |         |                                                                                                                                                                                                                                                                 |                     |
|------------------------------|-------------------------------------|--------------|-----|--------------------|--------------|---------------------------------------------------------------------------------------------------------------------------------------------------------------------------------------------------------------------------------------------------------------------------------------------------------------------------------------------------------------------------------------------|---------------------|-----|---------|-----------------------------------------------------------------------------------------------------------------------------------------------------------------------------------------------------------------------------------------------------------------|---------------------|
|                              |                                     |              |     | n                  | Intervention | Medication regimen                                                                                                                                                                                                                                                                                                                                                                          | Course              | n   | Control | Medication regimen                                                                                                                                                                                                                                              | Course              |
| Bromberg JEC et al, 2019 [1] | Netherlands, Australia, New Zealand | RCT          | 199 | 99                 | R-MBVP       | -Intravenous rituximab 375 mg per m <sup>2</sup> on days 0, 7, 14, and 21 in cycle one and days 0 and 14 in cycle two.<br>- Methotrexate 3 g per m <sup>2</sup> on days 1 and 15 of 28-day cycles, intravenous teniposide 100 mg per m <sup>2</sup> on days 2 and 3, intravenous carmustine 100 mg per m <sup>2</sup> on day 4, and oral prednisolone 60 mg per m <sup>2</sup> on days 1-5. | 28d/cycle, 2 cycles | 100 | MBVP    | Methotrexate 3 g per m <sup>2</sup> on days 1 and 15 of 28-day cycles, intravenous teniposide 100 mg per m <sup>2</sup> on days 2 and 3, intravenous carmustine 100 mg per m <sup>2</sup> on day 4, and oral prednisolone 60 mg per m <sup>2</sup> on days 1-5. | 28d/cycle, 2 cycles |

|                                   |                                                                     |                            |     |    |       |                                                                                                                                                                                                                                                                                                                                                                                                                                                                                                       |                       |    |     |                                                                                                                                                                                                                                                                                                                                                                                                                           |                       |
|-----------------------------------|---------------------------------------------------------------------|----------------------------|-----|----|-------|-------------------------------------------------------------------------------------------------------------------------------------------------------------------------------------------------------------------------------------------------------------------------------------------------------------------------------------------------------------------------------------------------------------------------------------------------------------------------------------------------------|-----------------------|----|-----|---------------------------------------------------------------------------------------------------------------------------------------------------------------------------------------------------------------------------------------------------------------------------------------------------------------------------------------------------------------------------------------------------------------------------|-----------------------|
| Ferreri<br>AJM et al, 2016<br>[2] | Denmark,<br>Germany,<br>Italy,<br>Switzerland,<br>United<br>Kingdom | RCT                        | 144 | 69 | R-MA  | <p>-Two doses of rituximab 375 mg/m<sup>2</sup> on days -5 and 0.</p> <p>-</p> <p>Methotrexate 3.5g/m<sup>2</sup> (0.5 g/m<sup>2</sup> in 15 min, followed by 3 g/m<sup>2</sup> in a 3-h infusion) on day 1 and cytarabine 2 g/m<sup>2</sup> (1-h infusion, twice daily, every 12 h) on days 2 and 3.</p> <p>-Rituximab 375 mg/m<sup>2</sup> on day1.</p> <p>-</p> <p>Methotrexate 3.5g/m<sup>2</sup> IV day 1 with hydration, alkalinisation and leucovorin rescue (25 mg IV every 6 h day 2-4),</p> | 3w/cycle,<br>4 cycles | 75 | MA  | <p>Methotrexate 3.5g/m<sup>2</sup> (0.5 g/m<sup>2</sup> in 15 min, followed by 3 g/m<sup>2</sup> in a 3-h infusion) on day 1 and cytarabine 2 g/m<sup>2</sup> (1-h infusion, twice daily, every 12 h) on days 2 and 3.</p> <p>Methotrexate 3.5g/m<sup>2</sup> IV day 1 with hydration, alkalinisation and leucovorin rescue (25 mg IV every 6 h day 2-4), vincristine 1.4 mg/m<sup>2</sup> (capped at 2 mg) IV day 1,</p> | 3w/cycle,<br>4 cycles |
| Patekar<br>M et al, 2019 [3]      | India                                                               | Retrospective cohort study | 73  | 27 | R-MVP | <p>Methotrexate 3.5g/m<sup>2</sup> IV day 1 with hydration, alkalinisation and leucovorin rescue (25 mg IV every 6 h day 2-4),</p>                                                                                                                                                                                                                                                                                                                                                                    | 2w/cycle,<br>5 cycles | 46 | MVP | <p>Methotrexate 3.5g/m<sup>2</sup> IV day 1 with hydration, alkalinisation and leucovorin rescue (25 mg IV every 6 h day 2-4), vincristine 1.4 mg/m<sup>2</sup> (capped at 2 mg) IV day 1,</p>                                                                                                                                                                                                                            | 2w/cycle,<br>5 cycles |

|                           |        |                            |    |    |       |                                                                                                                                                                                                                                                                                                                                                             |                      |    |     |                                                                                                                                                                                                                                              |                      |
|---------------------------|--------|----------------------------|----|----|-------|-------------------------------------------------------------------------------------------------------------------------------------------------------------------------------------------------------------------------------------------------------------------------------------------------------------------------------------------------------------|----------------------|----|-----|----------------------------------------------------------------------------------------------------------------------------------------------------------------------------------------------------------------------------------------------|----------------------|
| Chen C et al, 2019 [4]    | China  | Retrospective cohort study | 62 | 32 | R-MT  | <p>vincristine 1.4 mg/m<sup>2</sup> (capped at 2 mg) IV day 1, procarbazine 100 mg/m<sup>2</sup> P.O. days 1-7 in odd number cycles.</p> <p>-Rituximab 375 mg/m<sup>2</sup> on day 0.</p> <p>- Methotrexate (3.5g/m<sup>2</sup>) was intravenously administered on day 1, and temozolomide (150mg/m<sup>2</sup>) was orally administered on days 1 - 5.</p> | 3w/cycle, 6-8 cycles | 30 | MT  | <p>procarbazine 100 mg/m<sup>2</sup> P.O. days 1-7 in odd number cycles.</p> <p>Methotrexate (3.5g/m<sup>2</sup>) was intravenously administered on day 1, and temozolomide (150mg/m<sup>2</sup>) was orally administered on days 1 - 5.</p> | 3w/cycle, 6-8 cycles |
| Da Broi M et al, 2018 [5] | Norway | Retrospective cohort study | 43 | 18 | R-MVP | <p>- Rituximab 375 mg/m<sup>2</sup> on day 1.</p> <p>- Methotrexate 3.5g/m<sup>2</sup> IV day 1 with</p>                                                                                                                                                                                                                                                    | 2w/cycle, 5 cycles   | 25 | MVP | <p>- Methotrexate 3.5g/m<sup>2</sup> IV day 1 with hydration, alkalinisation and</p>                                                                                                                                                         | 2w/cycle, 5 cycles   |

|                       |       |                            |    |    |       |                                                                                                                                                                                                                                                                                                                                                                                                                                                                      |                    |    |     |                                                                                                                                                                                                                                                                                                                                                                                                           |                    |
|-----------------------|-------|----------------------------|----|----|-------|----------------------------------------------------------------------------------------------------------------------------------------------------------------------------------------------------------------------------------------------------------------------------------------------------------------------------------------------------------------------------------------------------------------------------------------------------------------------|--------------------|----|-----|-----------------------------------------------------------------------------------------------------------------------------------------------------------------------------------------------------------------------------------------------------------------------------------------------------------------------------------------------------------------------------------------------------------|--------------------|
| Sun X et al, 2017 [6] | China | Retrospective cohort study | 60 | 36 | R-MAD | <p>hydration, alkalinisation and leucovorin rescue (25 mg IV every 6 h day 2–4), vincristine 1.4 mg/m<sup>2</sup> (capped at 2 mg) IV day 1, procarbazine 100 mg/m<sup>2</sup> P.O. days 1-7 in odd number cycles.</p> <p>-Rituximab 375 mg/m<sup>2</sup> on day 0.</p> <p>-High dose methotrexate was administered intravenously at a dose of 3.5 g/m<sup>2</sup> over 3 hours on day 1; Ara-C was administered intravenously at (0.5–1) g/m<sup>2</sup> on day</p> | 3w/cycle, 6 cycles | 24 | MAD | <p>leucovorin rescue (25 mg IV every 6 h day 2–4), vincristine 1.4 mg/m<sup>2</sup> (capped at 2 mg) IV day 1, procarbazine 100 mg/m<sup>2</sup> P.O. days 1-7 in odd number cycles.</p> <p>High dose methotrexate was administered intravenously at a dose of 3.5 g/m<sup>2</sup> over 3 hours on day 1; Ara-C was administered intravenously at (0.5–1) g/m<sup>2</sup> on day 2; dexamethasone was</p> | 3w/cycle, 6 cycles |
|-----------------------|-------|----------------------------|----|----|-------|----------------------------------------------------------------------------------------------------------------------------------------------------------------------------------------------------------------------------------------------------------------------------------------------------------------------------------------------------------------------------------------------------------------------------------------------------------------------|--------------------|----|-----|-----------------------------------------------------------------------------------------------------------------------------------------------------------------------------------------------------------------------------------------------------------------------------------------------------------------------------------------------------------------------------------------------------------|--------------------|

|                                   |        |                                  |    |    |               |                                                                                                                                                                                                                                                                                                                                                                                                                                   |                                                                          |    |         |                                                                                                                                                                                                                                                                                                                                                                                                         |                                                                      |
|-----------------------------------|--------|----------------------------------|----|----|---------------|-----------------------------------------------------------------------------------------------------------------------------------------------------------------------------------------------------------------------------------------------------------------------------------------------------------------------------------------------------------------------------------------------------------------------------------|--------------------------------------------------------------------------|----|---------|---------------------------------------------------------------------------------------------------------------------------------------------------------------------------------------------------------------------------------------------------------------------------------------------------------------------------------------------------------------------------------------------------------|----------------------------------------------------------------------|
| Houillier<br>C et al,<br>2017 [7] | France | Retrospective<br>cohort<br>study | 90 | 39 | R-MPV-<br>AAA | <p>2;<br/>dexamethasone was administered at 5-10 mg on days 1-3.<br/>-Rituximab 375 mg/m<sup>2</sup> on day 0.<br/>-<br/>Methotrexate was administered intravenously at a dose of 3.5 g/m<sup>2</sup> on day 1 and day 15;<br/>procarbazine was administered at a dose of 100 mg/m<sup>2</sup>/day from day 1 to day 7;<br/>vincristine was administered at a dose of 1.4 g/m<sup>2</sup> on day 1 and day 15;<br/>cytarabine</p> | <p>-MPV:<br/>4w/cycle,<br/>3<br/>cycles;<br/><br/>-AAA: 3<br/>cycles</p> | 51 | MPV-AAA | <p>administered at 5-10 mg on days 1-3.<br/><br/>Methotrexate was administered intravenously at a dose of 3.5 g/m<sup>2</sup> on day 1 and day 15;<br/>procarbazine was administered at a dose of 100 mg/m<sup>2</sup>/day from day 1 to day 7;<br/>vincristine was administered at a dose of 1.4 g/m<sup>2</sup> on day 1 and day 15;<br/>cytarabine consolidation was administered at a dose of 3</p> | <p>-MPV:<br/>4w/cycle,<br/>3 cycles;<br/><br/>-AAA: 3<br/>cycles</p> |
|-----------------------------------|--------|----------------------------------|----|----|---------------|-----------------------------------------------------------------------------------------------------------------------------------------------------------------------------------------------------------------------------------------------------------------------------------------------------------------------------------------------------------------------------------------------------------------------------------|--------------------------------------------------------------------------|----|---------|---------------------------------------------------------------------------------------------------------------------------------------------------------------------------------------------------------------------------------------------------------------------------------------------------------------------------------------------------------------------------------------------------------|----------------------------------------------------------------------|

|                            |         |                            |     |    |                             |                                                                                                                                                                                                                                                                                                                            |     |                          |                                                                                                                                                                                      |                                      |  |
|----------------------------|---------|----------------------------|-----|----|-----------------------------|----------------------------------------------------------------------------------------------------------------------------------------------------------------------------------------------------------------------------------------------------------------------------------------------------------------------------|-----|--------------------------|--------------------------------------------------------------------------------------------------------------------------------------------------------------------------------------|--------------------------------------|--|
|                            |         |                            |     |    |                             | consolidation was administered at a dose of 3 g/m <sup>2</sup> on day 1 and day 2.<br>-Rituximab 375 mg/m <sup>2</sup> on day 1.<br>- Methotrexate, 1-3.5g/m <sup>2</sup> intravenously day 1 in 4 h infusion, vincristine, 2 mg intravenously day 1, and procarbazine 100mg/m <sup>2</sup> orally day 1-7 in odd courses. |     |                          |                                                                                                                                                                                      | g/m <sup>2</sup> on day 1 and day 2. |  |
| Mocikova H et al, 2016 [8] | Czech   | Retrospective cohort study | 164 | 49 | R-MVP                       | 2w/cycle, 5-7 cycles                                                                                                                                                                                                                                                                                                       | 115 | MVP                      | Methotrexate, 1-3.5g/m <sup>2</sup> intravenously day 1 in 4 h infusion, vincristine, 2 mg intravenously day 1, and procarbazine 100mg/m <sup>2</sup> orally day 1-7 in odd courses. | 2w/cycle, 5-7 cycles                 |  |
| Madle M et al, 2015 [9]    | Germany | Retrospective cohort study | 79  | 27 | R+ Combination chemotherapy | NA                                                                                                                                                                                                                                                                                                                         | 52  | Combination chemotherapy | Multiple combination chemotherapy (with or without high-dose methotrexate)                                                                                                           | NA                                   |  |
| Kansar                     | Canada  | Retrospective              | 74  | 25 | R+HDMTX                     | 2w/cycle                                                                                                                                                                                                                                                                                                                   | 49  | HDMTX                    | High-dose                                                                                                                                                                            | 2w/cycle,                            |  |





---

1.5 g/m<sup>2</sup> on  
days 3-5;  
dexamethas  
one was  
given for 10  
days during  
the first cycle  
only.

---

given for 10  
days during  
the first cycle  
only.

**Note:** R-MBVP: methotrexate, carmustine, teniposide, and prednisone (MBVP) plus rituximab; HDMTX: High dose methotrexate; R: Rituximab; HD-MA: high-dose methotrexate plus cytarabine; MVP: Methotrexate, vincristine, and procarbazine; MA: Methotrexate and Ara-C; MT: Methotrexate and temozolomide; MAD: Methotrexate, Ara-C and dexamethasone; MI: Methotrexate and ifosfamide; "NA ": not applicable.

### 6.3. Risk of bias

Supplementary Table S2.6.2. Risk of bias of included RCTs assessed by the Cochrane Risk of Bias tool

| Study ID                     | Random sequence generation (selection bias) | Allocation concealment (selection bias) | Blinding of participants and researchers (performance bias) | Blinding of outcome assessment (detection bias) | Incomplete outcome data (attrition bias) | Selective reporting (reporting bias) | Other bias |
|------------------------------|---------------------------------------------|-----------------------------------------|-------------------------------------------------------------|-------------------------------------------------|------------------------------------------|--------------------------------------|------------|
| Bromberg JEC et al, 2019 [1] | Low ROB                                     | Low ROB                                 | High ROB                                                    | Unclear ROB                                     | Low ROB                                  | Low ROB                              | Low ROB    |
| Ferreri AJM et al, 2016 [2]  | Low ROB                                     | Low ROB                                 | High ROB                                                    | Unclear ROB                                     | Low ROB                                  | Low ROB                              | Low ROB    |

Supplementary Table S2.6.3. Risk of bias of included cohort studies assessed by the Newcastle-Ottawa Scale

| Study ID                  | Selection of exposure                    |                                     |                                       |                                                                          | Comparability                            |                                          |                       | Outcome                                         |                                  | Total score |
|---------------------------|------------------------------------------|-------------------------------------|---------------------------------------|--------------------------------------------------------------------------|------------------------------------------|------------------------------------------|-----------------------|-------------------------------------------------|----------------------------------|-------------|
|                           | Representativeness of the exposed cohort | Selection of the non-exposed cohort | Ascertainment of exposure to implants | Demonstration that outcome of interest was not present at start of study | Study controls the most important factor | Study controls for any additional factor | Assessment of outcome | Was follow up long enough for outcomes to occur | Adequacy of follow up of cohorts |             |
| Patekar M et al, 2019 [3] | Yes                                      | Yes                                 | Yes                                   | Yes                                                                      | Yes                                      | No                                       | No                    | Yes                                             | Yes                              | 7           |
| Chen C et al, 2019 [4]    | Yes                                      | Yes                                 | Yes                                   | Yes                                                                      | Yes                                      | Yes                                      | No                    | Yes                                             | Yes                              | 8           |

|                             |     |     |     |     |     |     |     |     |     |   |
|-----------------------------|-----|-----|-----|-----|-----|-----|-----|-----|-----|---|
| Da Broi M et al, 2018 [5]   | Yes | Yes | Yes | Yes | Yes | Yes | No  | Yes | Yes | 8 |
| Sun X et al, 2017 [6]       | Yes | Yes | Yes | Yes | Yes | No  | No  | Yes | Yes | 7 |
| Houillier C et al, 2017 [7] | Yes | Yes | Yes | Yes | No  | No  | No  | Yes | Yes | 6 |
| Mocikova H et al, 2016 [8]  | Yes | Yes | Yes | Yes | Yes | Yes | No  | Yes | Yes | 8 |
| Madle M et al, 2015 [9]     | Yes | Yes | Yes | Yes | Yes | No  | No  | Yes | Yes | 7 |
| Kansara R et al, 2015 [10]  | Yes | Yes | Yes | Yes | Yes | Yes | No  | Yes | Yes | 8 |
| Holdhoff M et al, 2014 [11] | Yes | Yes | Yes | Yes | Yes | Yes | No  | Yes | Yes | 8 |
| Gregory G et al, 2013 [12]  | Yes | Yes | Yes | Yes | Yes | Yes | No  | Yes | Yes | 8 |
| Birnbaum T et al, 2012 [13] | Yes | Yes | Yes | Yes | Yes | No  | Yes | Yes | Yes | 8 |

Note: "\*" equals "low risk of bias"; "-" equals "high risk of bias".

## 6.4. Meta-analysis results

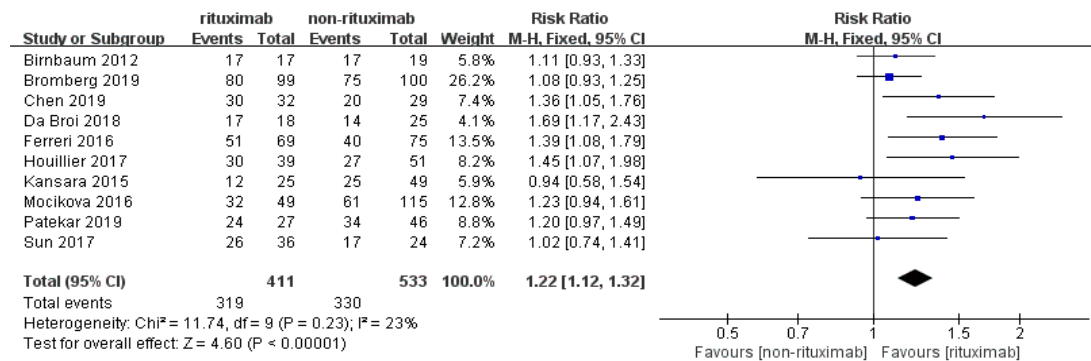

Supplementary Figure S2.6.1. Meta-analysis for OR in patient with PCNSL (rituximab vs. non-rituximab)

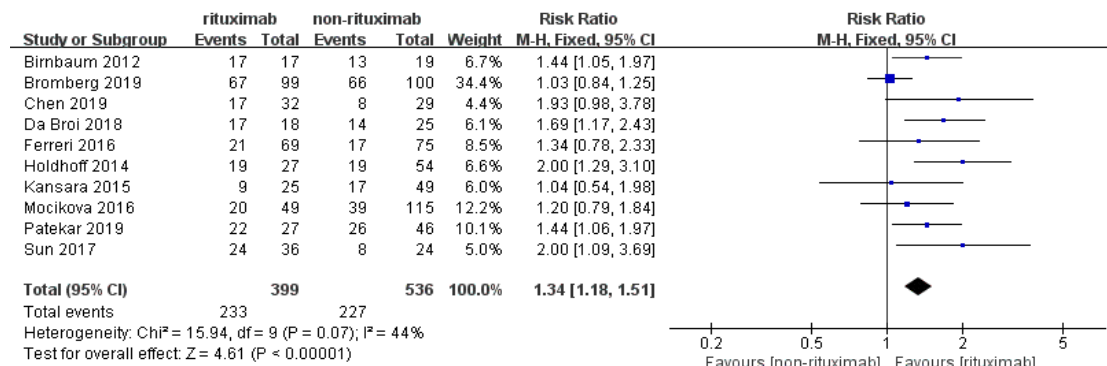

Supplementary Figure S2.6.2. Meta-analysis for CR in patient with PCNSL (rituximab vs. non-rituximab)

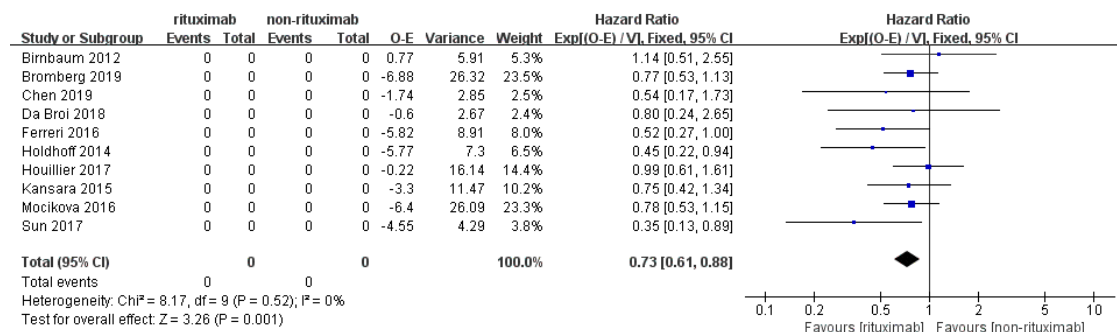

Supplementary Figure S2.6.3. Meta-analysis for PFS in patient with PCNSL (rituximab vs. non-rituximab)

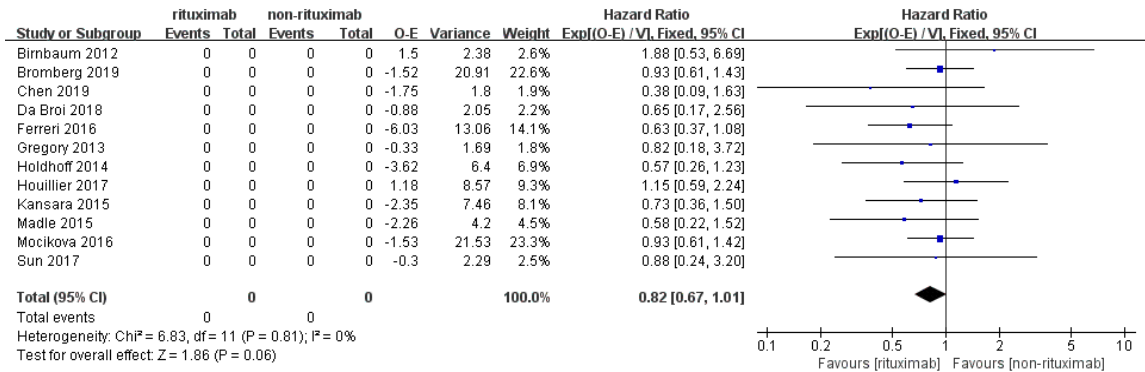

Supplementary Figure S2.6.4. Meta-analysis for OS in patient with PCNSL (rituximab vs. non- rituximab)

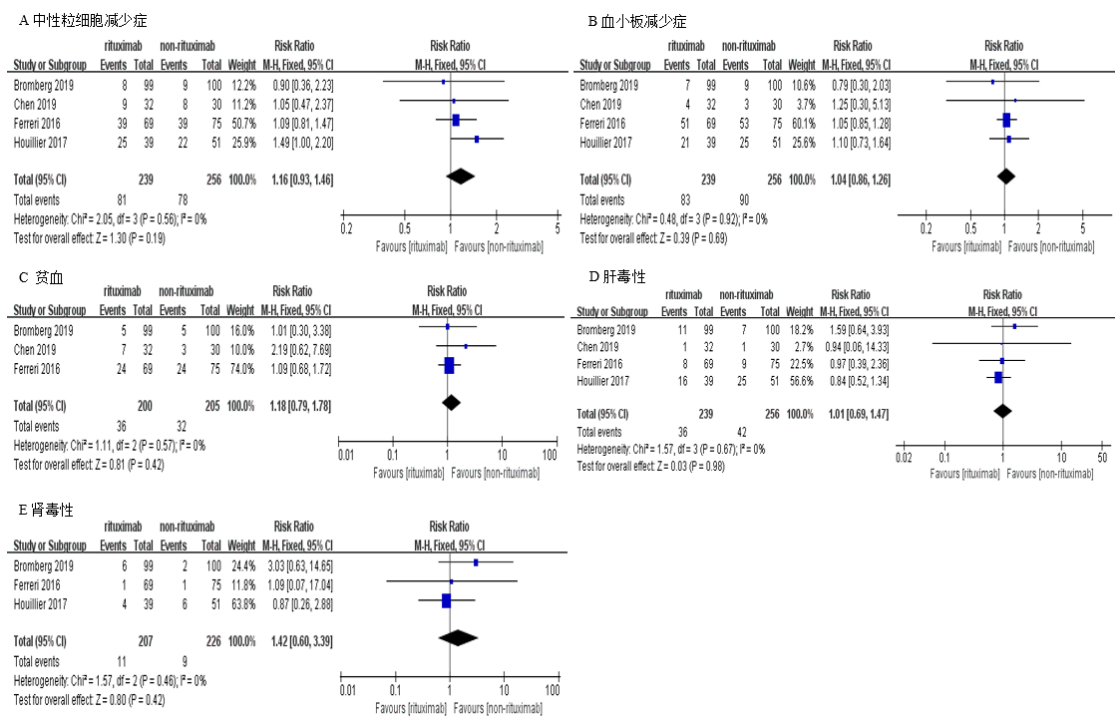

Supplementary Figure S2.6.5. Grade 3 or higher adverse events: A Neutropenia; B Thrombocytopenia; C Anemia; D Hepatotoxicity; E Nephrotoxicity.

## 6.5. Summary of finding (SoF) tables

| Outcomes   | Anticipated absolute effects* (95% CI) |                               | Relative effect<br>(95% CI)      | № of participants<br>(studies) | Certainty of the<br>evidence<br>(GRADE) | Comments |
|------------|----------------------------------------|-------------------------------|----------------------------------|--------------------------------|-----------------------------------------|----------|
|            | Risk with<br>[comparison]              | Risk with<br>[intervention]   |                                  |                                |                                         |          |
| <b>OR</b>  | 619 per 1,000                          | 755 per 1,000<br>(693 to 817) | <b>RR 1.22</b><br>(1.12 to 1.32) | 944<br>(10 studies)            | ⊕⊕○○<br>Low <sup>a</sup>                | None     |
| <b>CR</b>  | 424 per 1,000                          | 568 per 1,000<br>(500 to 639) | <b>RR 1.34</b><br>(1.18 to 1.51) | 935<br>(10 studies)            | ⊕⊕○○<br>Low <sup>a</sup>                | None     |
| <b>PFS</b> | NA                                     | NA                            | <b>HR 0.73</b><br>(0.61 to 0.88) | 953<br>(10 studies)            | ⊕⊕○○<br>Low <sup>a</sup>                | None     |
| <b>OS</b>  | NA                                     | NA                            | <b>HR 0.82</b><br>(0.67 to 1.01) | 1149<br>(12 studies)           | ⊕⊕○○<br>Low <sup>a</sup>                | None     |

\*The risk in the intervention group (and its 95% confidence interval) is based on the assumed risk in the comparison group and the relative effect of the intervention (and its 95% CI). CI: Confidence interval; RR: Risk ratio; HR: Hazard ratio; NA: Not applicable.

### Explanation

<sup>a</sup> The initial quality of evidence for the results of meta-analyses of observational studies was low.

## 6.6. References

- [1] Bromberg JEC, Issa S, Bakunina K, et al. Rituximab in patients with primary CNS lymphoma (HOVON 105/ALLG NHL 24): a randomised, open-label, phase 3 intergroup study. *The Lancet Oncology*. 2019;20(2):216 - 28.
- [2] Ferreri AJM, Cwynarski K, Pulczynski E, et al. Chemoimmunotherapy with methotrexate, cytarabine, thiotepa, and rituximab (MATRix regimen) in patients with primary CNS lymphoma: results of the first randomisation of the International Extranodal Lymphoma Study Group-32 (IELSG32) phase 2 trial. *The lancet haematology*. 2016;3(5):e217 - e27.
- [3] Patekar M, Adhikari N, Biswas A, et al. Primary CNS Lymphoma in India: A 17-Year Experience From the All India Institute of Medical Sciences. *Journal of global oncology*. 2019;5:1-9.
- [4] Chen C, Sun P, Cui J, et al. High-dose Methotrexate plus temozolomide with or without rituximab in patients with untreated primary central nervous system lymphoma: A retrospective study from China. *Cancer medicine*. 2019;8(4):1359-67.
- [5] Da Broi M, Jahr G, Beiske K, et al. Efficacy of the Nordic and the MSKCC chemotherapy protocols on the overall and progression-free survival in intracranial PCNSL. *Blood cells, molecules & diseases*. 2018;73:25-32.
- [6] Sun X, Liu J, Wang Y, et al. Methotrexate-cytarabine-dexamethasone combination chemotherapy with or without rituximab in patients with primary central nervous system lymphoma. *Oncotarget*. 2017;8(30):49156-64.
- [7] Houillier C, Ghesquières H, Chabrot C, et al. Rituximab, methotrexate, procarbazine, vincristine and intensified cytarabine consolidation for primary central nervous system lymphoma (PCNSL) in the elderly: a LOC network study. *Journal of neuro-oncology*. 2017;133(2):315-20.
- [8] Mocikova H, Pytlik R, Sykorova A, et al. Role of rituximab in treatment of patients with primary central nervous system lymphoma: a retrospective analysis of the Czech lymphoma study group registry. *Leukemia & lymphoma*. 2016;57(12):2777-83.
- [9] Madle M, Krämer I, Lehnert N, et al. The influence of rituximab, high-dose therapy followed by autologous stem cell transplantation, and age in patients with primary CNS lymphoma. *Annals of hematology*. 2015;94(11):1853-7.
- [10] Kansara R, Shenkier TN, Connors JM, et al. Rituximab with high-dose methotrexate in primary central nervous system lymphoma. *American journal of hematology*. 2015;90(12):1149-54.
- [11] Holdhoff M, Ambady P, Abdelaziz A, et al. High-dose methotrexate with or without rituximab in newly diagnosed primary CNS lymphoma. *Neurology*. 2014;83(3):235-9.

- [12]Gregory G, Arumugaswamy A, Leung T, et al. Rituximab is associated with improved survival for aggressive B cell CNS lymphoma. *Neuro-oncology*. 2013;15(8):1068-73.
- [13]Birnbaum T, Stadler EA, von Baumgarten L, et al. Rituximab significantly improves complete response rate in patients with primary CNS lymphoma. *Journal of neuro-oncology*. 2012;109(2):285-91.



**CQ 7. Which is the preferred approach to treat patients with PCNSL at consolidation therapy, whole-brain radiotherapy (WBRT) or autologous hematopoietic stem cell transplantation (ASCT)?**

- ⑩ Population: Patients with PCNSL
- ⑩ Intervention: Autologous hematopoietic stem cell transplantation (ASCT)
- ⑩ Comparison: Whole-brain radiotherapy (WBRT)

**7.1. Inclusion and exclusion criteria**

- ⑩ inclusion criteria: we only included published RCTs and observational studies in patient with PCNS, which compared whole-brain radiotherapy vs autologous hematopoietic stem cell transplantation. Studies published in English and Chinese are included.
- ⑩ exclusion criteria: we excluded studies where we failed to access full text, or studies without sufficient data.

## 7.2. Characteristic information of included studies

Supplementary Table S2.7.1. Characteristic information of included studies

| Study ID                    | Country | Study design        | N   | Intervention group |              |                                                                                                                                                                                                                                    | Control group |                |                                                                                                                                    |
|-----------------------------|---------|---------------------|-----|--------------------|--------------|------------------------------------------------------------------------------------------------------------------------------------------------------------------------------------------------------------------------------------|---------------|----------------|------------------------------------------------------------------------------------------------------------------------------------|
|                             |         |                     |     | n                  | Intervention | Medication regimen                                                                                                                                                                                                                 | n             | Control        | Medication regimen                                                                                                                 |
| Ferreri AJM et al, 2017 [1] | Italy   | RCT                 | 118 | 58                 | HDC-ASCT     | D-6: carmustine (400 mg/m <sup>2</sup> );<br>D-5,-4: thiotepa (5 mg/kg q12h)<br>D0: re-infusion of autologous peripheral blood stem cells                                                                                          | 55            | WBRT           | 36 Gy, with the addition of a 9 Gy tumour-bed boost in patients in partial response: photons of 4-10 MeV; 180 cGy/fraction; 5 d/wk |
| Houillier C et al, 2019 [2] | France  | RCT                 | 140 | 44                 | HDC-ASCT     | D-9,-8,-7: thiotepa (250 mg/m <sup>2</sup> /d);<br>D-6,-5,-4: busulfan (8 mg/kg);<br>D-3,-2: Cyclophosphamide (60 mg/kg/day);<br>D-3: polyethylene glycol filgrastim;<br>D0: re-infusion of autologous peripheral blood stem cells | 53            | WBRT           | 40 Gy: photons of 6-10 MeV; 2 Gy/fraction; 5 d/wk                                                                                  |
| Correa DD et al, 2019 [3]   | America | Observational study | 29  | 15                 | HDC-ASCT     | Thiotepa, busulfan, cyclophosphamide, and autohematopoietic stem cell transplantation                                                                                                                                              | 14            | rdWBRT + Ara-C | 23.4 Gy: 1.8 Gy/fraction; 13 day; two cycles of Ara-C                                                                              |

|                                      |        |                        |      |    |                       |                                                                                                                                                                                                                                                                        |     |                       |                                                      |
|--------------------------------------|--------|------------------------|------|----|-----------------------|------------------------------------------------------------------------------------------------------------------------------------------------------------------------------------------------------------------------------------------------------------------------|-----|-----------------------|------------------------------------------------------|
| Ferreri<br>AJM et<br>al, 2020<br>[4] | Italy  | Observational<br>study | 28   | 5  | HDC-ASCT              | Carmustine,<br>thiotepa, and<br>autohematopoietic<br>stem cell<br>transplantation<br>Thiotepa-based<br>HDC-ASCT: 86%;<br>BEAM-ASCT<br>(carmustine,<br>etoposide,<br>cytarabine,<br>melphalan +<br>autologous<br>hematopoietic<br>stem cell<br>transplantation):<br>14% | 7   | WBRT                  | 30-36 Gy                                             |
| Houillier<br>C et al,<br>2020<br>[5] | France | Observational<br>study | 1002 | 56 | HDC-ASCT              |                                                                                                                                                                                                                                                                        | 149 | WBRT                  | 18-56 Gy:<br>>30 Gy: 58%;<br>≤30 Gy: 32%;<br>NA: 10% |
| Kim JE<br>et al,<br>2012<br>[6]      | Korea  | Observational<br>study | 65   | 18 | Chemotherapy-<br>ASCT | NA                                                                                                                                                                                                                                                                     | 13  | Chemotherapy-<br>WBRT | NA                                                   |

HDC: high-dose chemotherapy; WBRT: whole-brain radiotherapy; ASCT: autologous hematopoietic stem cell transplantation; NA: not applicable.

### 7.3. Risk of bias

Table S2.7.2 Risk of bias of included RCTs assessed by the Cochrane Risk of Bias tool

| Study ID                    | Random sequence generation (selection bias) | Allocation concealment (selection bias) | Blinding of participants and researchers (performance bias) | Blinding of outcome assessment (detection bias) | Incomplete outcome data (attrition bias) | Selective reporting (reporting bias) | Other bias |
|-----------------------------|---------------------------------------------|-----------------------------------------|-------------------------------------------------------------|-------------------------------------------------|------------------------------------------|--------------------------------------|------------|
| Ferreri AJM et al, 2017 [1] | Low ROB                                     | Low ROB                                 | High ROB                                                    | Unclear ROB                                     | Low ROB                                  | Low ROB                              | Low ROB    |
| Houillier C et al, 2019 [2] | Low ROB                                     | Low                                     | High                                                        | Unclear ROB                                     | Low ROB                                  | Low ROB                              | Low ROB    |

**Note: ROB:** risk of bias.

Supplementary Table S2.7.3. Risk of bias of included observational studies assessed by the Newcastle-Ottawa Scale

| Study ID                    | Selection of exposure                    |                                     |                                       |                                                                          | Comparability                            |                                          |                       | Outcome                                         |                                  | Total score |
|-----------------------------|------------------------------------------|-------------------------------------|---------------------------------------|--------------------------------------------------------------------------|------------------------------------------|------------------------------------------|-----------------------|-------------------------------------------------|----------------------------------|-------------|
|                             | Representativeness of the exposed cohort | Selection of the non-exposed cohort | Ascertainment of exposure to implants | Demonstration that outcome of interest was not present at start of study | Study controls the most important factor | Study controls for any additional factor | Assessment of outcome | Was follow up long enough for outcomes to occur | Adequacy of follow up of cohorts |             |
| Rorrea DD et al, 2019 [3]   | Yes                                      | Yes                                 | Yes                                   | Yes                                                                      | No                                       | No                                       | No                    | Yes                                             | Yes                              | 6           |
| Ferreri AJM et al, 2020 [4] | Yes                                      | Yes                                 | Yes                                   | Yes                                                                      | No                                       | No                                       | No                    | Yes                                             | Yes                              | 6           |

|                             |     |     |     |     |     |    |    |     |     |   |
|-----------------------------|-----|-----|-----|-----|-----|----|----|-----|-----|---|
| Houillier C et al, 2020 [5] | Yes | Yes | Yes | Yes | Yes | No | No | Yes | Yes | 7 |
| Kim JE et al, 2012 [6]      | Yes | Yes | Yes | Yes | Yes | No | No | Yes | Yes | 7 |

**Note:** "\*" equals "low risk of bias"; "-" equals "high risk of bias".

## 7.4. Meta-analysis results

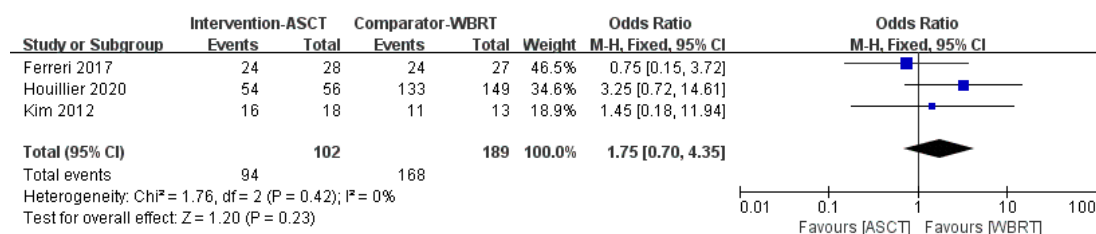

Supplementary Figure S2.7.1. Meta-analysis for OR in patient with PCNSL (ASCT vs. WBRT)

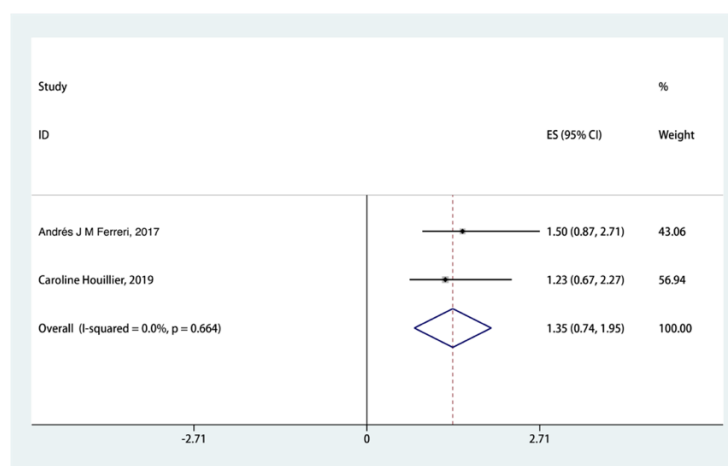

Supplementary Figure S2.7.2 Meta-analysis for 2-year PFS in patient with PCNSL (ASCT vs. WBRT).

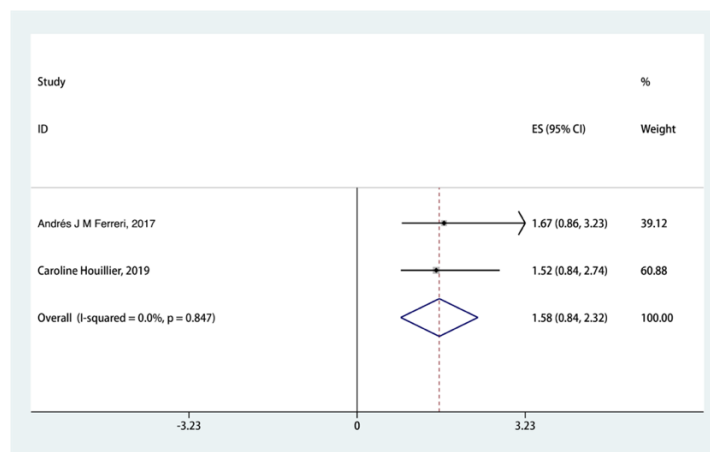

Supplementary Figure S2.7.3. Meta-analysis for 2-year OS in patient with PCNSL (ASCT vs. WBRT)

### 7.5. Summary of finding (SoF) tables

| Outcomes          | Anticipated absolute effects* (95% CI) |                            | Relative effect (95% CI)         | № of participants (studies)            | Certainty of the evidence (GRADE) | Comments |
|-------------------|----------------------------------------|----------------------------|----------------------------------|----------------------------------------|-----------------------------------|----------|
|                   | Risk with [comparison]                 | Risk with [intervention]   |                                  |                                        |                                   |          |
| <b>OR</b>         | 889 per 1,000                          | 933 per 1,000 (848 to 972) | <b>RR 1.75</b><br>(0.70 to 4.35) | 291<br>(1RCT, 2 observational studies) | ⊕○○○<br>Low <sup>a</sup>          | None     |
| <b>2-year PFS</b> | NA                                     | NA                         | <b>HR 1.35</b><br>(0.61 to 0.88) | 250<br>(2 RCTs)                        | ⊕⊕○○<br>Low <sup>a,b</sup>        | None     |
| <b>2-year OS</b>  | NA                                     | NA                         | <b>HR 1.58</b><br>(0.84 to 2.32) | 250<br>(2 RCTs)                        | ⊕⊕○○<br>Low <sup>a,b</sup>        | None     |

\*The risk in the intervention group (and its 95% confidence interval) is based on the assumed risk in the comparison group and the relative effect of the intervention (and its 95% CI). CI: Confidence interval; RR: Risk ratio; HR: Hazard ratio; NA: Not applicable.

#### Explanation

- a. The sample size is lower than the optimal information sample size.
- b. None of the RCTs were blinded.

## 7.6. References

- [1] Ferreri AJM, Cwynarski K, Pulczynski E, et al. Whole-brain radiotherapy or autologous stem-cell transplantation as consolidation strategies after high-dose methotrexate-based chemoimmunotherapy in patients with primary CNS lymphoma: results of the second randomisation of the International Extranodal Lymphoma Study Group-32 phase 2 trial. *The Lancet Haematology*. 2017;4(11):e510 - e23.
- [2] Houillier C, Taillandier L, Dureau S, et al. Radiotherapy or Autologous Stem-Cell Transplantation for Primary CNS Lymphoma in Patients 60 Years of Age and Younger: Results of the Intergroup ANOCEF-GOELAMS Randomized Phase II PRECIS Study. *Journal of Clinical Oncology*. 2019;37(10): 823-833.
- [3] Correa DD, Braun E, Kryza-Lacombe M, et al. Longitudinal cognitive assessment in patients with primary CNS lymphoma treated with induction chemotherapy followed by reduced-dose whole-brain radiotherapy or autologous stem cell transplantation. *Journal of Neuro-Oncology*. 2019;144(3):553-62.
- [4] Ferreri AJM, Calimeri T, Ponzoni M, et al. Improving the antitumor activity of R-CHOP with NGR-hTNF in primary CNS lymphoma: final results of a phase 2 trial. *Blood Adv*. 2020;4(15):3648-58.
- [5] Houillier C, Soussain C, Ghesquière H, et al. Management and outcome of primary CNS lymphoma in the modern era: An LOC network study. *Neurology*. 2020;94(10):e1027-e39.
- [6] Kim JE, Yoon DH, Kim S, et al. Relapse pattern and prognostic factors for patients with primary central nervous system lymphoma. *The Korean journal of hematology*. 2012;47(1):60-6.



## **CQ 8: Should BTK inhibitors be used to treat patients with PCNSL?**

- ⑩ Population: Patients with PCNSL
- ⑩ Intervention: BTK inhibitors
- ⑩ Comparison: Other treatment, placebo

### **8.1. Inclusion and exclusion criteria**

- ⑩ inclusion criteria: we included published studies, which treated the localized recurrent refractory PCNSL with BTK inhibitors. Studies published in English and Chinese are included.
- ⑩ exclusion criteria: we excluded studies where we failed to access full text, or studies without sufficient data.

## 8.2. Characteristic information of included studies

Supplementary Table S2.8.1. Characteristic information of included studies

| Study ID         | Country   | Research type | Disease Stage                         | N        | Intervention | Dosing method      | ORR         | CR    | PR    | PFS  | OS   |
|------------------|-----------|---------------|---------------------------------------|----------|--------------|--------------------|-------------|-------|-------|------|------|
| Yu 2021 [1]      | China     | Case report   | newly diagnosed / relapsed refractory | or<br>3  | ibrutinib    | single/combination | 100% (3/3)  | 67%   | 33%   | 7m   | 9.3m |
| Lewis 2021 [2]   | Australia | Case series   | relapsed refractory                   | or<br>9  | ibrutinib    | single/combination | 44% (4/9)   | 44%   | /     | 31m  | 31m  |
| Chen 2020 [3]    | China     | Case series   | newly diagnosed                       | 11       | ibrutinib    | ibrutinib+HD-MTX   | 82% (9/11)  | 64%   | 18%   | 7.4m | /    |
| Grommes 2017 [4] | America   | Case series   | relapsed refractory                   | or<br>13 | ibrutinib    | single/combination | 77% (10/13) | 38.5% | 38.5% | 4.6m | 15m  |
| Grommes 2019 [5] | America   | Cohort study  | relapsed refractory                   | or<br>9  | ibrutinib    | combination        | 89% (8/9)   | 67%   | 22%   | /    | /    |
| Chamoun 2017 [6] | French    | Case series   | relapsed refractory                   | or<br>14 | ibrutinib    | single/combination | 50% (7/14)  | 21%   | 28.5% | /    | /    |

|                      |         |                           |                                       |    |    |           |                                             |             |           |     |        |        |
|----------------------|---------|---------------------------|---------------------------------------|----|----|-----------|---------------------------------------------|-------------|-----------|-----|--------|--------|
| Lionakis 2017 [7]    | French  | Case series               | newly diagnosed / relapsed refractory | or | 18 | ibrutinib | single/combination                          | 94% (17/18) | 88%       | 6%  | 11.2 m | /      |
| Soussain 2019 [8]    | French  | Single-arm study          | relapsed refractory CNSL / PVRL       | or | 52 | ibrutinib | single                                      | 52% (27/52) | 19%       | 33% | 4.8m   | 19.2 m |
| LAUER EM 2020 [9]    | Germany | Single centre case series | relapsed refractory                   | or | 9  | ibrutinib | single/combination                          | 66% (6/9)   | 66% (6/9) | /   | /      | /      |
| Grommes 2018 [10]    | America | Single-arm study          | relapsed refractory                   | or | 27 | ibrutinib | single                                      | 81% (31/40) | /         | /   | /      | /      |
| Grommes 2019 [11]    | America | Single-arm study          | relapsed refractory                   | or | 6  | ibrutinib | Ibrutinib copanlisib +                      | 67% (4/6)   | 17%       | 50% | /      | /      |
| Dunleavy 2015 [12]   | America | Cohort study              | newly diagnosed / relapsed refractory | or | 11 | ibrutinib | single/combination (ibrutinib + DA-TEDDI-R) | 73% (8/11)  | /         | 64% | /      | /      |
| Bairey 2019 [13]     | Israel  | Single-arm study          | newly diagnosed / the elder           | /  | 12 | ibrutinib | Ibrutinib + HD-MTX                          | /           | 25%       | /   | 22.5 m | /      |
| Roschewski 2020 [14] | America | Single-arm study          | relapsed refractory                   | or | 13 | ibrutinib | combination                                 | 85% (11/13) | 61.5 %    | /   | /      | /      |

|                       |           |                                 |                                            |       |                                                |                   |             |                |        |        |
|-----------------------|-----------|---------------------------------|--------------------------------------------|-------|------------------------------------------------|-------------------|-------------|----------------|--------|--------|
| Lewis 2019 [15]       | Australia | Case series                     | newly diagnosed / relapsed refractory      | or 8  | ibrutinib combination                          | 50% (4/8)         | /           | /              | /      | /      |
| Roschewski 2018 [16]  | America   | Cohort study                    | newly diagnosed / relapsed refractory      | or 18 | ibrutinib ibrutinib + TEDD-R                   | /                 | 50%         | /              | 15.2 m | /      |
| Christian G 2015 [17] | America   | Case series                     | relapsed refractory                        | or 4  | ibrutinib single                               | 50%(2/4)          | /           | /              | /      | /      |
| Yuedan C 2020 [18]    | China     | Single-arm study                | relapsed refractory                        | or 18 | ibrutinib ibrutinib + I-MIDD regimen           | 83.3% (5/18)      | 55.5 %      | 27.8 %         | 6m     | /      |
| Narita 2021 [19]      | Japan     | non-randomized controlled study | relapsed refractory                        | or 44 | tirabrutinib single                            | 64% (28/44)       | 9.1% (4/44) | 29.5 % (13/44) | 4.9m   | /      |
| Hou K 2021 [20]       | China     | Systematic review               | non-GCB DLBCL and relapsed/refractory CNSL | 11 45 | ibrutinib Single/combination (ibrutinib + RTX) | 57.9 % (663/1145) | 35.0 %      | 20.1 %         | 4.45 m | 11.5 m |

/: none

### 8.3. Risk of bias

Supplementary Table S2.8.2. Risk of bias of included non-randomized controlled studies assessed by the Newcastle-Ottawa Scale

| Study ID             | Selection of exposure                    |                                     |                                       |                                                                          | Comparability                            |                                          |                       | Outcome                                         |                                  | Total score |
|----------------------|------------------------------------------|-------------------------------------|---------------------------------------|--------------------------------------------------------------------------|------------------------------------------|------------------------------------------|-----------------------|-------------------------------------------------|----------------------------------|-------------|
|                      | Representativeness of the exposed cohort | Selection of the non-exposed cohort | Ascertainment of exposure to implants | Demonstration that outcome of interest was not present at start of study | Study controls the most important factor | Study controls for any additional factor | Assessment of outcome | Was follow up long enough for outcomes to occur | Adequacy of follow up of cohorts |             |
| Grommes 2019 [5]     | c                                        | Yes                                 | Yes                                   | Yes                                                                      | Yes                                      | No                                       | No                    | Yes                                             | Yes                              | 7           |
| Dunleavy 2015 [12]   | Yes                                      | No                                  | Yes                                   | Yes                                                                      | Yes                                      | No                                       | No                    | Yes                                             | Yes                              | 6           |
| Roschewski 2018 [16] | Yes                                      | Yes                                 | No                                    | Yes                                                                      | Yes                                      | No                                       | No                    | Yes                                             | Yes                              | 6           |
| Soussain [8]         | Yes                                      | No                                  | Yes                                   | Yes                                                                      | Yes                                      | No                                       | No                    | Yes                                             | Yes                              | 6           |
| LAUER EM [9]         | Yes                                      | Yes                                 | Yes                                   | Yes                                                                      | Yes                                      | Yes                                      | Yes                   | Yes                                             | Yes                              | 4           |
| Grommes [10]         | Yes                                      | Yes                                 | Yes                                   | Yes                                                                      | Yes                                      | No                                       | No                    | Yes                                             | Yes                              | 7           |
| Grommes [11]         | Yes                                      | Yes                                 | Yes                                   | Yes                                                                      | Yes                                      | No                                       | No                    | Yes                                             | Yes                              | 7           |
| Bairey [13]          | Yes                                      | No                                  | Yes                                   | No                                                                       | No                                       | Yes                                      | Yes                   | No                                              | Yes                              | 5           |
| Roschewski [14]      | Yes                                      | Yes                                 | Yes                                   | No                                                                       | No                                       | Yes                                      | No                    | No                                              | No                               | 4           |
| Yuedan C [18]        | Yes                                      | Yes                                 | No                                    | Yes                                                                      | Yes                                      | No                                       | No                    | Yes                                             | Yes                              | 6           |
| Narita[19]           | Yes                                      | Yes                                 | Yes                                   | Yes                                                                      | Yes                                      | No                                       | No                    | Yes                                             | Yes                              | 7           |

Supplementary Table S2.8.3. Risk of bias of included case report and case series studies assessed by the Institute of Health Economics checklist

| Study ID     | Study objective                                                | Study population                                                             |                                                   |                                                                       |                                            |                                                                     | Intervention and co-intervention                    |                                                                         |
|--------------|----------------------------------------------------------------|------------------------------------------------------------------------------|---------------------------------------------------|-----------------------------------------------------------------------|--------------------------------------------|---------------------------------------------------------------------|-----------------------------------------------------|-------------------------------------------------------------------------|
|              | Is the hypothesis, aim, objective of the study clearly stated? | Are the characteristics of the participants included in the study described? | Were the cases collected in more than one centre? | Are the eligibility criteria for entry into the study clearly stated? | Were participants recruited consecutively? | Did participants enter the study at a similar point in the disease? | Was the intervention of interest clearly described? | Were additional interventions (co-interventions) reported in the study? |
| Yu [1]       | Yes                                                            | No                                                                           | No                                                | Unclear                                                               | Unclear                                    | Unclear                                                             | No                                                  | Yes                                                                     |
| Lewis [2]    | Yes                                                            | Yes                                                                          | Yes                                               | Unclear                                                               | Unclear                                    | No                                                                  | Yes                                                 | Yes                                                                     |
| Chen [3]     | Yes                                                            | Yes                                                                          | Yes                                               | Unclear                                                               | Unclear                                    | No                                                                  | Yes                                                 | Yes                                                                     |
| Grommes [4]  | Yes                                                            | Yes                                                                          | Yes                                               | Unclear                                                               | Unclear                                    | No                                                                  | Yes                                                 | Yes                                                                     |
| Chamoun [6]  | Yes                                                            | Yes                                                                          | Yes                                               | Unclear                                                               | Unclear                                    | No                                                                  | Yes                                                 | Yes                                                                     |
| Lionakis [7] | Yes                                                            | Yes                                                                          | Yes                                               | Unclear                                                               | Unclear                                    | No                                                                  | Yes                                                 | Yes                                                                     |
| Lewis [15]   | Yes                                                            | Yes                                                                          | Yes                                               | Unclear                                                               | Unclear                                    | No                                                                  | Yes                                                 | Yes                                                                     |

Continued Supplementary Table S2.8.3.

| Study ID | Outcome measure                                |                                                                       |                                                      | Statistical analysis                                            | Results and conclusions               |                                     |
|----------|------------------------------------------------|-----------------------------------------------------------------------|------------------------------------------------------|-----------------------------------------------------------------|---------------------------------------|-------------------------------------|
|          | Are the outcome measures established a priori? | Were the relevant outcomes measured with appropriate objective and/or | Were the relevant outcomes measured before and after | Were the statistical tests used to assess the relevant outcomes | Was the length of follow-up reported? | Was the loss to follow-up reported? |

|              |                  | <b>subjective methods?</b> | <b>the intervention?</b> | <b>appropriate?</b> |         |         |
|--------------|------------------|----------------------------|--------------------------|---------------------|---------|---------|
| Yu [1]       | Yes              | Yes                        | No                       | Yes                 | No      | No      |
| Lewis [2]    | Partial reported | Unclear                    | No                       | Unclear             | No      | No      |
| Chen [3]     | Yes              | Yes                        | No                       | No                  | No      | No      |
| Grommes [4]  | Yes              | Yes                        | No                       | Yes                 | Unclear | No      |
| Chamoun [6]  | No               | Yes                        | Yes                      | No                  | Unclear | Unclear |
| Lionakis [7] | No               | Partial reported           | Yes                      | No                  | Unclear | Unclear |
| Lewis [15]   | No               | Yes                        | Yes                      | No                  | No      | Unclear |

Continued Supplementary Table S2.8.3.

| <b>Study ID</b> | <b>Results and conclusions</b>                                                                               |                                                                       |                                                               | <b>Competing interest and source of support</b>                                    | <b>New items</b>                              |                                                                            | <b>Total score</b> |
|-----------------|--------------------------------------------------------------------------------------------------------------|-----------------------------------------------------------------------|---------------------------------------------------------------|------------------------------------------------------------------------------------|-----------------------------------------------|----------------------------------------------------------------------------|--------------------|
|                 | <b>Does the study provide estimates of the random variability in the data analysis of relevant outcomes?</b> | <b>Are the adverse events related with the intervention reported?</b> | <b>Are the conclusions of the study supported by results?</b> | <b>Are both competing interests and sources of support for the study reported?</b> | <b>Was the study conducted prospectively?</b> | <b>Were the relevant outcomes assessed blinded to intervention status?</b> |                    |
| Yu [1]          | No                                                                                                           | No                                                                    | Yes                                                           | Yes                                                                                | Unclear                                       | Unclear                                                                    | 10                 |
| Lewis [2]       | No                                                                                                           | No                                                                    | Yes                                                           | Partial reported                                                                   | No                                            | Unclear                                                                    | 5                  |
| Chen [3]        | No                                                                                                           | No                                                                    | Yes                                                           | Partial reported                                                                   | Yes                                           | Unclear                                                                    | 8                  |
| Grommes [4]     | No                                                                                                           | No                                                                    | Yes                                                           | No                                                                                 | Yes                                           | Unclear                                                                    | 9                  |
| Chamoun [6]     | No                                                                                                           | No                                                                    | Unclear                                                       | Yes                                                                                | Unclear                                       | No                                                                         | 8                  |

|              |                  |         |         |         |     |    |   |
|--------------|------------------|---------|---------|---------|-----|----|---|
| Lionakis [7] | Partial reported | Unclear | Unclear | Unclear | Yes | No | 6 |
| Lewis [15]   | Yes              | Yes     | Unclear | Yes     | No  | No | 8 |

Supplementary Table S2.8.4 Risk of bias of included systematic reviews assessed by the AMSTAR

| <b>Study ID</b> | <b>Was an 'a priori' design provided?</b> | <b>Was there duplicate study selection and data extraction?</b> | <b>Was a comprehensive literature search performed?</b> | <b>Was the status of publication (i.e., grey literature) used as an inclusion criterion?</b> | <b>Was a list of studies (included and excluded) provided?</b> | <b>Were the characteristics of the included studies provided?</b> | <b>Was the scientific quality of the included studies assessed and documented?</b> | <b>Was the scientific quality of the included studies used appropriately in formulating conclusions?</b> | <b>Were the methods used to combine the findings of studies appropriate?</b> | <b>Was the likelihood of publication bias assessed?</b> | <b>Was the likelihood of publication bias assessed?</b> |
|-----------------|-------------------------------------------|-----------------------------------------------------------------|---------------------------------------------------------|----------------------------------------------------------------------------------------------|----------------------------------------------------------------|-------------------------------------------------------------------|------------------------------------------------------------------------------------|----------------------------------------------------------------------------------------------------------|------------------------------------------------------------------------------|---------------------------------------------------------|---------------------------------------------------------|
| Houk [20]       | No                                        | Yes                                                             | Yes                                                     | Yes                                                                                          | No                                                             | Yes                                                               | Yes                                                                                | Yes                                                                                                      | Yes                                                                          | No                                                      | Yes                                                     |



## 8.4 Meta-analysis results

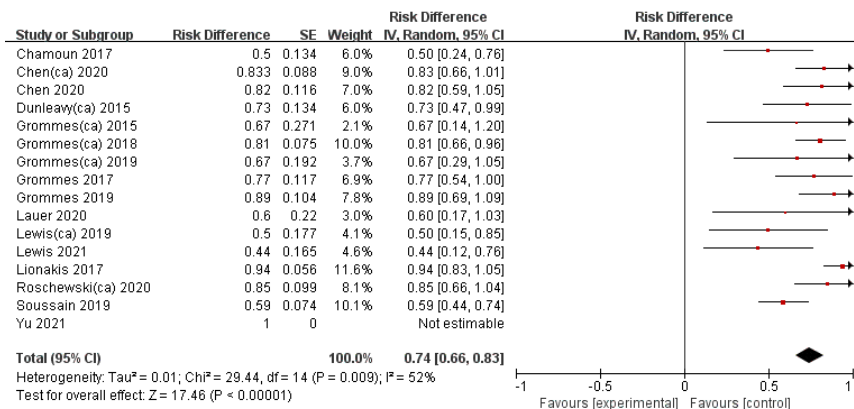

Supplementary Figure S2.8.1. Forest plot of overall efficiency of ibrutinib

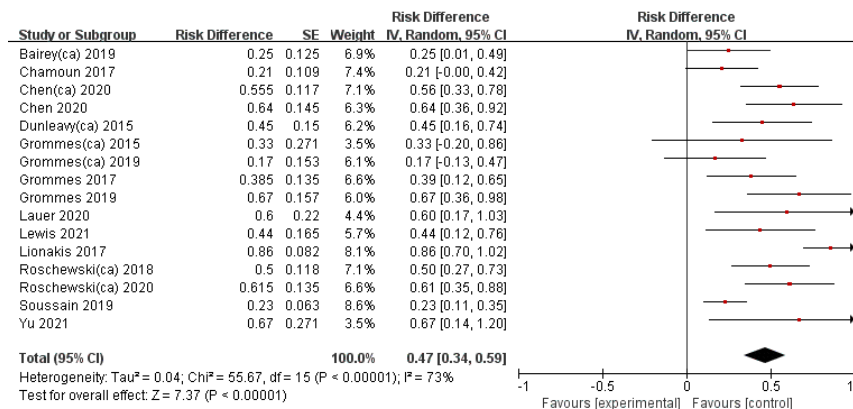

Supplementary Figure S2.8.2. Forest plot of complete remission rate of ibrutinib

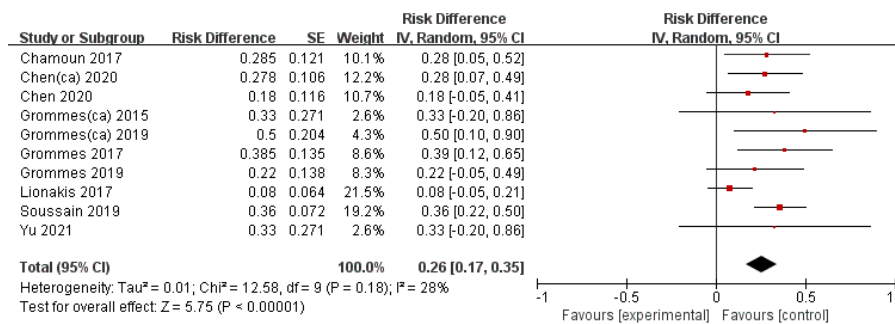

Supplementary Figure S2.8.3. Forest plot of partial response rate of ibrutinib

### A Single

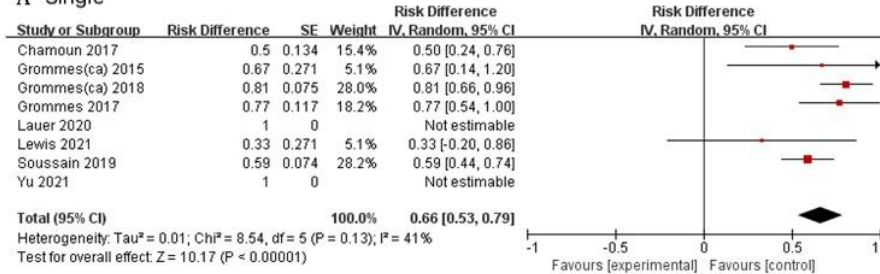

### B Combination

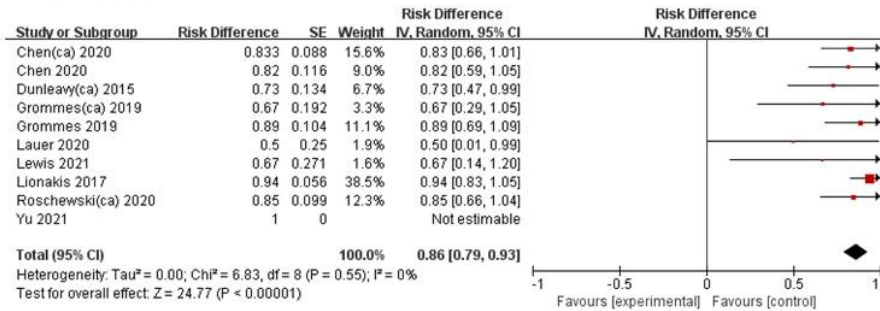

Supplementary Figure S2.8.4. Forest plot of overall efficiency of ibrutinib for PCNSL (A) alone (B) in combination

### A Single

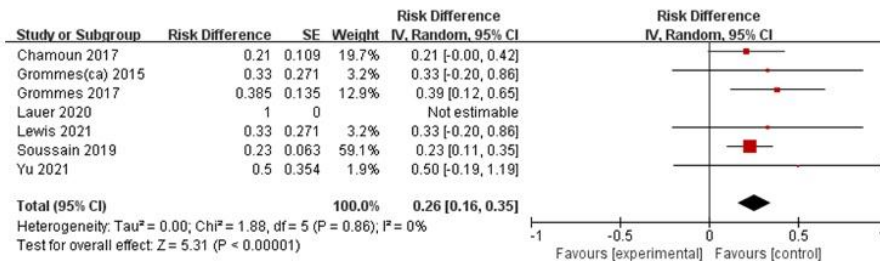

### B Combination

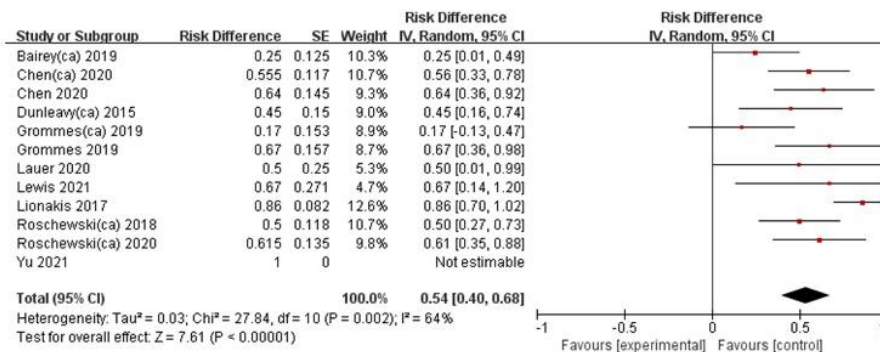

Supplementary Figure S2.8.5. Forest plot of complete remission rate of PCNSL treated with ibrutinib (A) alone (B) in combination

### A Single

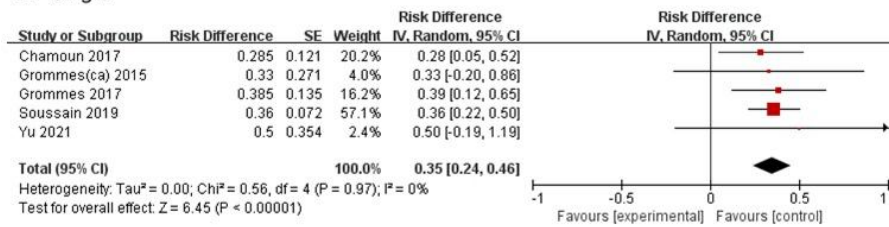

### B Combination

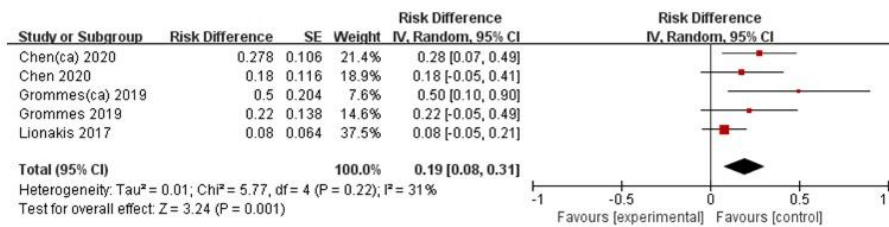

Supplementary Figure S2.8.6. Forest plot of partial remission rate of PCNSL treated with ibrutinib (A) alone (B) in combination

### 8.5. Summary of finding (SoF) tables

| Outcomes                | Anticipated absolute effects* (95% CI) |                          | Relative effect (95% CI) | No of participants (studies)      | Certainty of the evidence (GRADE) | Comments |
|-------------------------|----------------------------------------|--------------------------|--------------------------|-----------------------------------|-----------------------------------|----------|
|                         | Risk with [comparison]                 | Risk with [intervention] |                          |                                   |                                   |          |
| overall efficiency      | -                                      | -                        | -                        | 215<br>(15 observational studies) | ⊕⊕○○<br>LOW                       |          |
| complete remission rate | -                                      | -                        | -                        | 199<br>(14 observational studies) | ⊕⊕○○<br>LOW                       |          |
| partial response rate   | -                                      | -                        | -                        | 158<br>(11 observational studies) | ⊕⊕○○<br>LOW                       |          |

\***The risk in the intervention group** (and its 95% confidence interval) is based on the assumed risk in the comparison group and the **relative effect** of the intervention (and its 95% CI).

CI: confidence interval

#### GRADE Working Group grades of evidence

**High certainty:** we are very confident that the true effect lies close to that of the estimate of the effect.

**Moderate certainty:** we are moderately confident in the effect estimate: the true effect is likely to be close to the estimate of the effect, but there is a possibility that it is substantially different.

**Low certainty:** our confidence in the effect estimate is limited: the true effect may be substantially different from the estimate of the effect.

**Very low certainty:** we have very little confidence in the effect estimate: the true effect is likely to be substantially different from the estimate of effect.

#### Explanation

a. the risk of bias in many items is unclear; b.  $I^2=65$ ; c. the simple size is under 300

## 8.6. Reference

- [1] YU H, KONG H, LI C, et al. Bruton's tyrosine kinase inhibitors in primary central nervous system lymphoma-evaluation of anti-tumor efficacy and brain distribution [J]. *TRANSLATIONAL CANCER RESEARCH*, 2021, 10(5): 1975-83.
- [2] Lewis K L, CHIN C K, MANOS K, et al. Ibrutinib for central nervous system lymphoma: the Australasian Lymphoma Alliance/MD Anderson Cancer Center experience [J]. *Br J Haematol*, 2021, 192(6): 1049-53.
- [3] Chen F, Pang D, Guo H, et al. Clinical outcomes of newly diagnosed primary CNS lymphoma treated with ibrutinib - based combination therapy: A real - world experience of off - label ibrutinib use[J]. *Cancer medicine*, 2020, 9(22): 8676-8684.
- [4] GROMMES C, PASTORE A, PALASKAS N, et al. Ibrutinib Unmasks Critical Role of Bruton Tyrosine Kinase in Primary CNS Lymphoma [J]. *Cancer discovery*, 2017, 7(9): 1018-1029.
- [5] Grommes C, Tang S S, Wolfe J, et al. Phase 1b trial of an ibrutinib-based combination therapy in recurrent/refractory CNS lymphoma[J]. *Blood, The Journal of the American Society of Hematology*, 2019, 133(5): 436-445.
- [6] CHAMOUN K, CHOQUET S, BOYLE E, et al. Ibrutinib monotherapy in relapsed/refractory CNS lymphoma: A retrospective case series [J]. *Neurology*, 2017, 88(1): 101-2.
- [7] LIONAKIS M S, DUNLEAVY K, ROSCHEWSKI M, et al. Inhibition of B Cell Receptor Signaling by Ibrutinib in Primary CNS Lymphoma [J]. *Cancer cell*, 2017, 31(6): 833-43.e5.
- [8] Soussain C, Choquet S, Blonski M, et al. Ibrutinib monotherapy for relapse or refractory primary CNS lymphoma and primary vitreoretinal lymphoma: final analysis of the phase II 'proof-of-concept'iLOC study by the Lymphoma study association (LYSA) and the French oculo-cerebral lymphoma (LOC) network[J]. *European journal of cancer*, 2019, 117: 121-130.
- [9] LAUER EM, WATERHOUSE M, BRAIG M, et al. Ibrutinib in patients with relapsed/refractory central nervous system lymphoma: A retrospective single-centre analysis [J]. *Br J Haematol*, 2020, 190(2): e110-e4.
- [10] Grommes C, Wolfe J, Gavrilovic I, et al. Phase II of single-agent ibrutinib in recurrent/refractory primary (PCNSL) and secondary CNS lymphoma (SCNSL)[J]. *Blood*, 2018, 132: 2965.
- [11] Grommes C, Gavrilovic I, Miller A M, et al. Phase Ib of copanlisib in combination with ibrutinib in recurrent/refractory primary CNS lymphoma (PCNSL)[J]. *Blood*, 2019, 134: 1598.
- [12] Dunleavy K, Lai C E, Roschewski M, et al. Phase I study of dose-adjusted-Teddi-R with ibrutinib in untreated and relapsed/refractory primary CNS lymphoma[J]. *Blood*, 2015, 126(23): 472.

- [13]Bairey O, Amiel A, Yust-Katz S, et al. P05. 04 Phase 2 open-label study of maintenance treatment with ibrutinib following first line methotrexate-based immuno-chemotherapy in elderly patients with primary CNS lymphoma (PCNSL)[J]. *Neuro-Oncology*, 2019, 21(Suppl 3): iii34.
- [14]Roschewski M, Melani C, Lakhota R, et al. Phase 1 study of escalating doses of ibrutinib and temozolomide, etoposide, liposomal doxorubicin, dexamethasone, rituximab (TEDDI-R) with isavuconazole for relapsed and refractory primary CNS lymphoma[J]. *Blood*, 2020, 136: 12-13.
- [15]Lewis K L, Manos K, Casey J, et al. Outcomes for Patients with Primary or Secondary Central System Lymphoma Treated with Ibrutinib: A Multicentre Retrospective Analysis[J]. *Blood*, 2019, 134: 1620.
- [16]Roschewski M, Lionakis M S, Melani C, et al. Dose-adjusted teddi-R induces durable complete remissions in relapsed and refractory primary CNS lymphoma[J]. *Blood*, 2018, 132: 4195.
- [17]Christian G, Thomas K, Abdel-Wahab O, et al. Phase I Study of Single Agent Ibrutinib in Recurrent/Refractory Primary and Secondary CNS Lymphoma[J]. *Blood*, 2015, 126(23): 3960.
- [18]Yuedan C, Sun X, Bai X, et al. Preliminary Exploration of Ibrutinib Combined with Methotrexate, Ifosfamide, Liposomal Doxorubicin and Methylprednisolone in the Treatment of Relapsed/Refractory Primary CNS Lymphoma[J]. *Blood*, 2020, 136: 13-14.
- [19]Narita, Y., Nagane, M., Mishima, K., et al., Phase I/II study of tirabrutinib, a second-generation Bruton's tyrosine kinase inhibitor, in relapsed/refractory primary central nervous system lymphoma[J]. **Neuro Oncol**, 2021. 23(1): p. 122-133.
- [20]Hou K, Yu Z, Jia, Y, et al., Efficacy and safety of ibrutinib in diffuse large B-cell lymphoma: A single-arm meta-analysis[J]. **Crit Rev Oncol Hematol**, 2020. 152: p. 103010.

**CQ 9: Should stereotactic radiosurgery be used to treat localized recurrent PCNSL patients who were refractory to chemotherapy and previously received WBRT?**

- ⑩ Population: Patients with localized recurrent PCNSL who were refractory to chemotherapy and previously received WBRT
- ⑩ Intervention: Treat with stereotactic radiosurgery (SRS)
- ⑩ Comparison: Other treatment

**9.1. Inclusion and exclusion criteria**

- ⑩ inclusion criteria: we included published studies, which treated the localized recurrent refractory PCNSL with SRS. Studies published in English and Chinese are included.
- ⑩ exclusion criteria: we excluded studies where we failed to access full text, or studies without sufficient data.

## 9.2. Characteristic information of included studies

Supplementary Table S2.9.1. Characteristic information of included studies

| Study ID            | Publication year | Country  | N                            | Population      | Study type  | Lesion                                                                  | Volume of tumors                                                 | Dosage                             | Other treatment | C R | P R | SD+ PD | mP FS            | mO S | Neurovirulence |
|---------------------|------------------|----------|------------------------------|-----------------|-------------|-------------------------------------------------------------------------|------------------------------------------------------------------|------------------------------------|-----------------|-----|-----|--------|------------------|------|----------------|
| Matsumoto et al [1] | 2007             | Japanese | 2                            | recurrent PCNSL | case report | Patient 1: Single lesion (38.4 *39.1 *30.0 mm with a volume of 24.6 mL) | NR                                                               | Center dose 30Gy<br>Edge dose 15Gy | NR              | N R | N R | NR     | 3m               | 13m  | NR             |
|                     |                  |          |                              |                 |             | Patient 2: Multiple lesions                                             | NR                                                               | NR                                 | NR              | N R | N R | NR     | 13m              | 15m  | NR             |
| Kenai et al [2]     | 2006             | Sweden   | 22 (4 initial, 18 recurrent) | PCNSL           | case series | 16.2 mm (3.24 mm-42.4 mm)                                               | 4.14cm <sup>3</sup> (0.02cm <sup>3</sup> - 39.9cm <sup>3</sup> ) | Maximum dose 38.5 Gy<br>Edge dose  | NR              | N R | N R | NR     | 32.1m (6m - 67m) | NR   | 0 (0%)         |



|                    |      |          |                              |                                 |             |    |                                                               |                                                       |    |            |          |       |                    |        |
|--------------------|------|----------|------------------------------|---------------------------------|-------------|----|---------------------------------------------------------------|-------------------------------------------------------|----|------------|----------|-------|--------------------|--------|
| Sakamoto et al [3] | 2006 | Japanese | 9                            | recurrent PCNSL                 | case report | NR | 3.5mL(0.4-24.5mL)                                             | 16.5 Gy<br>Minimum dose 9.1Gy<br>Maximum dose 15.2 Gy | NR | 8(88.9%)   | 1(11.1%) | NR    | 7.7 m              | 0 (0%) |
| Shin et al [4]     | 2017 | America  | 23 (7 initial, 16 recurrent) | PCNSL                           | case series | NR | 4cm <sup>3</sup> (0.1cm <sup>3</sup> -26cm <sup>3</sup> )     | NR                                                    | NR | NR         | NR       | NR    | 11 m (5.7 - 33.2m) | 0 (0%) |
| Kumar et al [5]    | 2015 | America  | 14 (7 initial, 7 recurrent)  | Intracranial recurrent lymphoma | case series | NR | 6.7cm <sup>3</sup> (0.5cm <sup>3</sup> -37.7cm <sup>3</sup> ) | Edge dose 15.5 Gy<br>Maximum dose 32Gy                | NR | 11 (78.6%) | NR       | 3.3 m | 9.5 m (0.4m-94 m)  | 0 (0%) |

NR: Not report; CR: Complete Response; PR: Partial Response; SD+PD: Stable Disease + Progressive Disease; mPFS: median Progression-Free Survival; mOS: median Overall Survival.

### 9.3. Risk of bias

Supplementary Table 2.9.2. Risk of bias of included case series assessed by the Institute of Health Economics checklist

| Study ID         | Study objective                                                | Study population                                                             |                                                   |                                                                       |                                            |                                                                     | Intervention and co-intervention                    |                                                                         |
|------------------|----------------------------------------------------------------|------------------------------------------------------------------------------|---------------------------------------------------|-----------------------------------------------------------------------|--------------------------------------------|---------------------------------------------------------------------|-----------------------------------------------------|-------------------------------------------------------------------------|
|                  | Is the hypothesis, aim, objective of the study clearly stated? | Are the characteristics of the participants included in the study described? | Were the cases collected in more than one centre? | Are the eligibility criteria for entry into the study clearly stated? | Were participants recruited consecutively? | Did participants enter the study at a similar point in the disease? | Was the intervention of interest clearly described? | Were additional interventions (co-interventions) reported in the study? |
| Matsumoto et al. | Yes                                                            | Yes                                                                          | No                                                | Yes                                                                   | Unclear                                    | No                                                                  | Yes                                                 | Yes                                                                     |
| Kenai et al.     | Yes                                                            | Yes                                                                          | No                                                | No                                                                    | Yes                                        | No                                                                  | Yes                                                 | Unclear                                                                 |
| Sakamoto et al.  | No                                                             | Yes                                                                          | No                                                | No                                                                    | Yes                                        | No                                                                  | Yes                                                 | No                                                                      |
| Shin et al.      | Yes                                                            | Yes                                                                          | Yes                                               | Partial reported                                                      | Yes                                        | No                                                                  | Yes                                                 | Unclear                                                                 |
| Kumar et al.     | Yes                                                            | Yes                                                                          | No                                                | Partial reported                                                      | Unclear                                    | Unclear                                                             | Yes                                                 | Unclear                                                                 |

Continued Supplementary Table S2.9.2.

| Study ID | Outcome measure                                |                                          |                                                | Statistical analysis                                   | Results and conclusions               |                           |
|----------|------------------------------------------------|------------------------------------------|------------------------------------------------|--------------------------------------------------------|---------------------------------------|---------------------------|
|          | Are the outcome measures established a priori? | Were the relevant outcomes measured with | Were the relevant outcomes measured before and | Were the statistical tests used to assess the relevant | Was the length of follow-up reported? | Was the loss to follow-up |

|                  |                  | appropriate objective and/or subjective methods? | after the intervention ? | outcomes appropriate ? |         | reported ? |
|------------------|------------------|--------------------------------------------------|--------------------------|------------------------|---------|------------|
| Matsumoto et al, | No               | No                                               | Unclear                  | Yes                    | Unclear | No         |
| Kenai et al.     | Partial reported | Unclear                                          | Unclear                  | Unclear                | Yes     | No         |
| Sakamoto et al.  | Yes              | Yes                                              | Unclear                  | Yes                    | No      | No         |
| Shin et al.      | Yes              | Yes                                              | Unclear                  | Yes                    | Yes     | No         |
| Kumar et al.     | Partial reported | Unclear                                          | Unclear                  | Yes                    | Yes     | No         |

Continued Supplementary Table S2.9.2

| Study ID         | Results and conclusions                                                                               |                                                                |                                                        | Competing interest and source of support                                    | New items                              |                                                                     | Total score |
|------------------|-------------------------------------------------------------------------------------------------------|----------------------------------------------------------------|--------------------------------------------------------|-----------------------------------------------------------------------------|----------------------------------------|---------------------------------------------------------------------|-------------|
|                  | Does the study provide estimates of the random variability in the data analysis of relevant outcomes? | Are the adverse events related with the intervention reported? | Are the conclusions of the study supported by results? | Are both competing interests and sources of support for the study reported? | Was the study conducted prospectively? | Were the relevant outcomes assessed blinded to intervention status? |             |
| Matsumoto et al, | No                                                                                                    | Yes                                                            | Yes                                                    | No                                                                          | Unclear                                | Unclear                                                             | 8           |
| Kenai et al.     | No                                                                                                    | Partial reported                                               | Yes                                                    | No                                                                          | Unclear                                | Unclear                                                             | 6           |

|                 |                  |     |     |                  |         |         |    |
|-----------------|------------------|-----|-----|------------------|---------|---------|----|
| Sakamoto et al. | No               | Yes | Yes | No               | No      | Unclear | 8  |
| Shin et al.     | Partial reported | Yes | Yes | Yes              | Unclear | Unclear | 12 |
| Kumar et al.    | Yes              | Yes | Yes | Partial reported | No      | Unclear | 8  |

#### 9.4. Reference

- [1] Matsumoto Y, Horiike S, Fujimoto Y, et al. Effectiveness and limitation of gamma knife radiosurgery for relapsed central nervous system lymphoma: a retrospective analysis in one institution. *International Journal of Hematology*. 2007;85(4):333-337.
- [2] Kenai H, Yamashita M, Nakamura T, et al. Gamma Knife surgery for primary central nervous system lymphoma: usefulness as palliative local tumor control. *Journal of Neurosurgery*. 2006;105 Suppl:133-138.
- [3] Sakamoto M, Oya N, Mizowaki T, et al. Initial experiences of palliative stereotactic radiosurgery for recurrent brain lymphomas. *Journal of Neuro-Oncology*. 2006;77(1):53-58.
- [4] Shin SM, Silverman JS, Bowden G, et al. Relapsed or refractory primary central nervous system lymphoma radiosurgery: Report of the International Gamma Knife Research Foundation. *Journal of Radiosurgery and SBRT*. 2017;4(4):247-253.
- [5] Kumar R, Laack N, Pollock BE, et al. Stereotactic Radiosurgery in the Treatment of Recurrent CNS Lymphoma. *World Neurosurgery*. 2015;84(2):390-397.

**CQ 10. Which is the preferred approach to make the diagnosis of a suspected PVRL, vitreous biopsy or aqueous humor/vitreous puncture?**

- ⑩ Population: Patients with PVRL
- ⑩ Intervention: Diagnosis with vitreous biopsy
- ⑩ Comparison: Diagnosis with aqueous humor/vitreous puncture

**10.1. Inclusion and exclusion criteria**

- ⑩ inclusion criteria: we included published studies, which compared the diagnosis sensitivity and specificity for a suspected PVRL patient between vitreous biopsy or aqueous humor/vitreous puncture.
- ⑩ exclusion criteria: we excluded studies where we failed to access full text, or studies without sufficient data.

## 10.2. Characteristic information of included studies

Supplementary Table S2.10.1. Characteristic information of included studies

| Study ID                   | Publication year | Country    | N            | Population                      | Study type   | Paired - samples | Aqueous humor/vitreous puncture                   |                |                  | Vitreous biopsy                                   |                |                  |
|----------------------------|------------------|------------|--------------|---------------------------------|--------------|------------------|---------------------------------------------------|----------------|------------------|---------------------------------------------------|----------------|------------------|
|                            |                  |            |              |                                 |              |                  | Diagnosis methods                                 | Sample numbers | Positive numbers | Diagnosis methods                                 | Sample numbers | Positive numbers |
| Oahalo u A et al [1]       | 2014             | Netherland | 75 (84 eyes) | suspected patients with uveitis | case series  | Yes              | cytologic-testing                                 | 53 eyes        | 0                | cytologic-testing plus flow cytometry             | 53 eyes        | 1 eye            |
| Hiemck e-Jiwa LS et al [2] | 2018             | Netherland | 23 (28 eyes) | patients with VRL               | cohort study | Yes              | polymerase chain reaction (MYD88 L265P)           | 11 (12 eyes)   | 8 (8 eyes)       | cytologic-testing plus flow cytometry             | 11 (12 eyes)   | 7 (8 eyes)       |
|                            |                  |            |              |                                 |              | No               | polymerase chain reaction (MYD88 L265P)           | 10 (15 eyes)   | 2 (3 eyes)       | cytologic-testing plus flow cytometry             | 8 (9 eyes)     | 4 (4 eyes)       |
| Dalal M et al [3]          | 2014             | America    | 27           | patients with VRL               | case series  | No               | cytology, microdissection plus molecular analysis | 3              | 2                | cytology, microdissection plus molecular analysis | 19             | 15               |
| Miserocchi E et al [4]     | 2019             | Italy      | 8 (16 eyes)  | patients with VRL               | case series  | No               | polymerase chain reaction (MYD88 L265P)           | 8 (15 eyes)    | 6 (8 eyes)       | cytologic-testing                                 | 8 (10 eyes)    | 7 (8 eyes)       |

|                     |      |        |     |                                 |             |    |                    |    |    |                                       |    |    |
|---------------------|------|--------|-----|---------------------------------|-------------|----|--------------------|----|----|---------------------------------------|----|----|
| Cassoux N et al [5] | 2007 | France | 167 | suspected patients with uveitis | case series | No | molecular analysis | 45 | 40 | cytologic-testing plus flow cytometry | 51 | 47 |
|---------------------|------|--------|-----|---------------------------------|-------------|----|--------------------|----|----|---------------------------------------|----|----|

---



### 10.3. Risk of bias

Supplementary Table S2.10.2. Risk of bias of included cohort studies assessed by the Newcastle-Ottawa Scale

| Study ID              | Selection of exposure                    |                                     |                                       |                                                                          | Comparability                            |                                          |                       | Outcome                                         |                                  | Total score |
|-----------------------|------------------------------------------|-------------------------------------|---------------------------------------|--------------------------------------------------------------------------|------------------------------------------|------------------------------------------|-----------------------|-------------------------------------------------|----------------------------------|-------------|
|                       | Representativeness of the exposed cohort | Selection of the non-exposed cohort | Ascertainment of exposure to implants | Demonstration that outcome of interest was not present at start of study | Study controls the most important factor | Study controls for any additional factor | Assessment of outcome | Was follow up long enough for outcomes to occur | Adequacy of follow up of cohorts |             |
| Hiemcke-Jiwa LS et al | Yes                                      | Yes                                 | Yes                                   | Yes                                                                      | No                                       | No                                       | Yes                   | Yes                                             | Yes                              | 7           |

Supplementary Table S2.10.3. Risk of bias of included case series assessed by the Institute of Health Economics checklist

| Study ID        | Study objective                                                | Study population                                                             |                                                   |                                                                       |                                            |                                                                     | Intervention and co-intervention                    |                                                                         |
|-----------------|----------------------------------------------------------------|------------------------------------------------------------------------------|---------------------------------------------------|-----------------------------------------------------------------------|--------------------------------------------|---------------------------------------------------------------------|-----------------------------------------------------|-------------------------------------------------------------------------|
|                 | Is the hypothesis, aim, objective of the study clearly stated? | Are the characteristics of the participants included in the study described? | Were the cases collected in more than one centre? | Are the eligibility criteria for entry into the study clearly stated? | Were participants recruited consecutively? | Did participants enter the study at a similar point in the disease? | Was the intervention of interest clearly described? | Were additional interventions (co-interventions) reported in the study? |
| Oahalou A et al | Yes                                                            | Yes                                                                          | No                                                | Yes                                                                   | Yes                                        | Unclear                                                             | Yes                                                 | Unclear                                                                 |
| Dalal M et al   | Yes                                                            | Yes                                                                          | No                                                | Partial reported                                                      | Yes                                        | Unclear                                                             | Yes                                                 | Unclear                                                                 |

|                    |     |     |         |                  |     |         |     |         |
|--------------------|-----|-----|---------|------------------|-----|---------|-----|---------|
| Miserocchi E et al | Yes | Yes | Unclear | Partial reported | Yes | Unclear | Yes | Unclear |
| Cassoux N et al    | Yes | Yes | No      | Partial reported | Yes | Unclear | Yes | Unclear |

Continued Supplementary Table 2.10.3.

| Study ID           | Outcome measure                                |                                                                                           |                                                                        | Statistical analysis                                                         | Results and conclusions               |                                     |
|--------------------|------------------------------------------------|-------------------------------------------------------------------------------------------|------------------------------------------------------------------------|------------------------------------------------------------------------------|---------------------------------------|-------------------------------------|
|                    | Are the outcome measures established a priori? | Were the relevant outcomes measured with appropriate objective and/or subjective methods? | Were the relevant outcomes measured before and after the intervention? | Were the statistical tests used to assess the relevant outcomes appropriate? | Was the length of follow-up reported? | Was the loss to follow-up reported? |
| Oahalou A et al    | Yes                                            | Yes                                                                                       | No                                                                     | Yes                                                                          | No                                    | No                                  |
| Dalal M et al      | Partial reported                               | Unclear                                                                                   | No                                                                     | Unclear                                                                      | No                                    | No                                  |
| Miserocchi E et al | Yes                                            | Yes                                                                                       | No                                                                     | No                                                                           | No                                    | No                                  |
| Cassoux N et al    | Yes                                            | Yes                                                                                       | No                                                                     | Yes                                                                          | Unclear                               | No                                  |

Continued Supplementary Table S2.10.3.

| Study ID | Results and conclusions                                     |                                                       |                                                        | Competing interest and source of support                                    | New items                              |                                                              | Total score |
|----------|-------------------------------------------------------------|-------------------------------------------------------|--------------------------------------------------------|-----------------------------------------------------------------------------|----------------------------------------|--------------------------------------------------------------|-------------|
|          | Does the study provide estimates of the random variability? | Are the adverse events related with the intervention? | Are the conclusions of the study supported by results? | Are both competing interests and sources of support for the study reported? | Was the study conducted prospectively? | Were the relevant outcomes assessed blinded to intervention? |             |

|                    | Quality in the data analysis of relevant outcomes? | Confidence reported? |     |                  |         | Confidence status? |    |
|--------------------|----------------------------------------------------|----------------------|-----|------------------|---------|--------------------|----|
| Oahalou A et al    | No                                                 | No                   | Yes | Yes              | Unclear | Unclear            | 10 |
| Dalal M et al      | No                                                 | No                   | Yes | Partial reported | No      | Unclear            | 5  |
| Miserocchi E et al | No                                                 | No                   | Yes | Partial reported | Yes     | Unclear            | 8  |
| Cassoux N et al    | No                                                 | No                   | Yes | No               | Yes     | Unclear            | 9  |

#### 10.4. Reference

- [1] Oahalou A, Schellekens PA, de Groot-Mijnes JD, et al. Diagnostic pars plana vitrectomy and aqueous analyses in patients with uveitis of unknown cause. *Retina*. 2014;34(1):108-114.
  - [2] Hiemcke-Jiwa LS, Ten DN, Leguit RJ, et al. Potential Diagnosis of Vitreoretinal Lymphoma by Detection of MYD88 Mutation in Aqueous Humor with Ultrasensitive Droplet Digital Polymerase Chain Reaction. *JAMA Ophthalmology*. 2018;136(10):1098-1104.
  - [3] Dalal M, Casady M, Moriarty E, et al. Diagnostic procedures in vitreoretinal lymphoma. *Ocular Immunology and Inflammation*. 2014;22(4):270-276.
  - [4] Miserochi E, Ferreri A, Giuffrè C, et al. MYD88 L265P MUTATION DETECTION IN THE AQUEOUS HUMOR OF PATIENTS WITH VITREORETINAL LYMPHOMA. *Retina*. 2019;39(4):679-684.
- Cassoux N, Giron A, Bodaghi B, et al. IL-10 measurement in aqueous humor for screening patients with suspicion of primary intraocular lymphoma. *Investigative Ophthalmology & Visual Science*. 2007;48(7):3253-3259.

**CQ 11: Which is the preferred approach to treat PVRL patients and PCNSL patients with concurrent VRL, systemic therapy, local therapy, or combined systemic and local therapy?**

- ⑩ Population: PVRL patients and PCNSL patients with concurrent VRL
- ⑩ Intervention: systemic treatment
- ⑩ Comparison: local treatment, or combined systemic and local treatment

**11.1. Inclusion and exclusion criteria**

- ⑩ inclusion criteria: we included published studies, which compared the systemic treatment, local treatment, or combined systemic and local treatment for PVRL patients and PCNSL patients with concurrent VRL.
- ⑩ exclusion criteria: we excluded studies where we failed to access full text, or studies without sufficient data.

## 11.2. Characteristic information of included studies

Supplementary Table S2.11.1. Characteristic information of included studies

| Study ID                  | Country                   | N   | Age          | Systemic treatment | Local treatment | Combined systemic and local treatment | Follow time              |
|---------------------------|---------------------------|-----|--------------|--------------------|-----------------|---------------------------------------|--------------------------|
| Castellino, et al 2019[1] | United States             | 69  | 65 (36-85)   | 34                 | 19              | 15                                    | 33.6 (95% CI: 1.2-175.2) |
| Klimova, et al 2018[2]    | Czech Republic            | 20  | 61 (48-77)   | 1                  | 3               | 16                                    | 66 (14-166)              |
| Akiyama, et al 2016[3]    | Japan                     | 10  | 68.5 (46-78) | -                  | 8               | 10                                    | 29.5                     |
| Grimm, et al 2008[4]      | 16 centers in 7 countries | 221 | 60           | 74                 | -               | 106                                   | 36                       |
| Jahnke, et al 2006[5]     | Germany                   | 22  | 64 (38-83)   | 13                 | 9               | -                                     | 10.25                    |
| Grimm, et al 2007[6]      | 16 centers in 7 countries | 83  | 63 (24-85)   | -                  | 23              | 53                                    | 32                       |
| Riemens, et al 2015[7]    | 17 centers in Europe      | 78  | 58 (39-86)   | 40                 | 30              | 17                                    | 49                       |

“-“: not applicable

### 11.3 Risk of bias

Supplementary Table S2.11.2. Risk of bias of included cohort studies assessed by the Newcastle-Ottawa Scale

| Study ID                  | Selection of exposure                    |                                     |                                       |                                                                          | Comparability                            |                                          | Outcome               |                                                 |                                  | Total score |
|---------------------------|------------------------------------------|-------------------------------------|---------------------------------------|--------------------------------------------------------------------------|------------------------------------------|------------------------------------------|-----------------------|-------------------------------------------------|----------------------------------|-------------|
|                           | Representativeness of the exposed cohort | Selection of the non-exposed cohort | Ascertainment of exposure to implants | Demonstration that outcome of interest was not present at start of study | Study controls the most important factor | Study controls for any additional factor | Assessment of outcome | Was follow up long enough for outcomes to occur | Adequacy of follow up of cohorts |             |
| Castellino, et al 2019[1] | Yes                                      | Yes                                 | Yes                                   | No                                                                       | No                                       | No                                       | Yes                   | Yes                                             | Yes                              | 6           |
| Klimova, et al 2018[2]    | Yes                                      | Yes                                 | Yes                                   | No                                                                       | No                                       | No                                       | Yes                   | Yes                                             | Yes                              | 6           |
| Grimm, et al 2008[4]      | Yes                                      | Yes                                 | Yes                                   | No                                                                       | No                                       | No                                       | Yes                   | Yes                                             | Yes                              | 6           |
| Jahnke, et al 2006[5]     | Yes                                      | Yes                                 | Yes                                   | No                                                                       | No                                       | No                                       | Yes                   | Yes                                             | Yes                              | 6           |
| Grimm, et al 2007[6]      | Yes                                      | Yes                                 | Yes                                   | No                                                                       | No                                       | No                                       | Yes                   | Yes                                             | Yes                              | 6           |
| Riemens, et al 2015[7]    | Yes                                      | Yes                                 | Yes                                   | No                                                                       | No                                       | No                                       | Yes                   | Yes                                             | Yes                              | 6           |

Supplementary Table S2.11.3. National Institutes of Health (NIH) Study Quality Assessment Tools for Before-After (Pre-Post) Studies with No Control Group

| Item                                                                                                                                                                                       | Akiyama, et al<br>2016[3] |
|--------------------------------------------------------------------------------------------------------------------------------------------------------------------------------------------|---------------------------|
| 1. Was the study question or objective clearly stated?                                                                                                                                     | Yes                       |
| 2. Were eligibility/selection criteria for the study population prespecified and clearly described?                                                                                        | Yes                       |
| 3. Were the participants in the study representative of those who would be eligible for the test/service/intervention in the general or clinical population of interest?                   | Yes                       |
| 4. Were all eligible participants that met the prespecified entry criteria enrolled?                                                                                                       | Yes                       |
| 5. Was the sample size sufficiently large to provide confidence in the findings?                                                                                                           | Not reported              |
| 6. Was the test/service/intervention clearly described and delivered consistently across the study population?                                                                             | Yes                       |
| 7. Were the outcome measures prespecified, clearly defined, valid, reliable, and assessed consistently across all study participants?                                                      | Yes                       |
| 8. Were the people assessing the outcomes blinded to the participants' exposures/interventions?                                                                                            | Not reported              |
| 9. Was the loss to follow-up after baseline 20% or less? Were those lost to follow-up accounted for in the analysis?                                                                       | Yes                       |
| 10. Did the statistical methods examine changes in outcome measures from before to after the intervention? Were statistical tests done that provided p values for the pre-to-post changes? | Yes                       |
| 11. Were outcome measures of interest taken multiple times before the intervention and multiple times after the intervention (i.e., did they use an interrupted time-series design)?       | Yes                       |
| 12. If the intervention was conducted at a group level (e.g., a whole hospital, a community, etc.) did the                                                                                 | Yes                       |



|                                                                                                                  |             |
|------------------------------------------------------------------------------------------------------------------|-------------|
| statistical analysis take into account the use of individual-level data to determine effects at the group level? |             |
| <b>Quality Rating</b>                                                                                            | <b>Good</b> |

#### 11.4. Reference

- [1] Castellino A, Pulido JS, Johnston PB, et al. Role of systemic high-dose methotrexate and combined approaches in the management of vitreoretinal lymphoma: A single center experience 1990-2018. *Am J Hematol.* 2019;94(3):291-298. doi:10.1002/ajh.25350.
- [2] Klimova A, Heissigerova J, Rihova E, et al. Combined treatment of primary vitreoretinal lymphomas significantly prolongs the time to first relapse. *Br J Ophthalmol.* 2018;102(11):1579-1585. doi:10.1136/bjophthalmol-2017-311574.
- [3] Akiyama H, Takase H, Kubo F, et al. High-dose methotrexate following intravitreal methotrexate administration in preventing central nervous system involvement of primary intraocular lymphoma. *Cancer Sci.* 2016;107(10):1458-1464. doi:10.1111/cas.13012.
- [4] Grimm SA, McCannel CA, Omuro AM, et al. Primary CNS lymphoma with intraocular involvement: International PCNSL Collaborative Group Report. *Neurology.* 2008;71(17):1355-1360. doi:10.1212/01.wnl.0000327672.04729.8c.
- [5] Jahnke K, Korfel A, Komm J, et al. Intraocular lymphoma 2000-2005: results of a retrospective multicentre trial. *Graefes Arch Clin Exp Ophthalmol.* 2006;244(6):663-669. doi:10.1007/s00417-005-0138-9.
- [6] Grimm SA, Pulido JS, Jahnke K, et al. Primary intraocular lymphoma: an International Primary Central Nervous System Lymphoma Collaborative Group Report. *Ann Oncol.* 2007;18(11):1851-1855. doi:10.1093/annonc/mdm340.
- [7] Riemens A, Bromberg J, Touitou V, et al. Treatment strategies in primary vitreoretinal lymphoma: a 17-center European collaborative study. *JAMA Ophthalmol.* 2015;133(2):191-197. doi:10.1001/jamaophthalmol.2014.4755.
